# Supplementary material for: On the engineering of reductase-based-monooxygenase activity in CYP450 peroxygenases
Source: Royal Society of Chemistry journal article supplement (doi:10.1039/d3sc06538c), 2024-01-01
Supplement: d3sc06538c1.pdf [file d3sc06538c1.pdf]

## Supporting Information

### On the Engineering of Reductase-Based-Monooxygenase Activity in CYP450 Peroxygenases

Shalini Yadav, Sason Shaik\* and Kshatresh Dutta Dubey\*

1. Department of Chemistry, School of Natural Science, Shiv Nadar Institution of Eminence, NH91 Tehsil Dadri, Greater Noida, Uttar Pradesh 201314, India. Email: [kshatresh.dubey@snu.edu.in](mailto:kshatresh.dubey@snu.edu.in)

2. Institute of Chemistry, Edmond J. Safra Campus at Givat Ram, The Hebrew University, Jerusalem, 9190401 Israel. Email: [sason@yfaat.ch.huji.ac.il](mailto:sason@yfaat.ch.huji.ac.il)

#### Table of Content:

|                                                                                                                                         |           |
|-----------------------------------------------------------------------------------------------------------------------------------------|-----------|
| <b>Scheme S1:</b> Scheme for the generic steps involve in Cpd I formation in CYP450                                                     | <b>S2</b> |
| <b>Table S1:</b> Trajectory Clustering Analysis                                                                                         | <b>S3</b> |
| <b>Figure S1:</b> RMSD and RMSF Analysis of MD simulation at ferric peroxo state                                                        | <b>S3</b> |
| <b>Section S1:</b> SPM Analysis                                                                                                         | <b>S3</b> |
| <b>Figure S2:</b> Pictorial representation of angle and distance change between two domains during MD simulation in ferric peroxo state | <b>S4</b> |
| <b>Table S2.</b> Interaction energy calculated for the C-helix and $\alpha$ 1-helix by MMPBSA calculations                              | <b>S4</b> |
| <b>Figure S3.</b> Water occupancy and water flow near heme propionate in ferric peroxo state                                            | <b>S5</b> |
| <b>Figure S4.</b> Possible tunnels present at the axial site of the heme and alterations in B-C loop for water flow                     | <b>S5</b> |
| <b>Figure S5.</b> QM/MM optimized QM zone for the dioxygen $\rightarrow$ Cpd 0 formation through Arg66                                  | <b>S6</b> |
| <b>Figure S6.</b> RMSD of OleT-BM3R in Cpd 0 state for 500 ns of simulation time                                                        | <b>S6</b> |
| <b>Figure S7.</b> Water occupancy near 8 Å of heme in Cpd 0 state of OleT-BM3R                                                          | <b>S7</b> |
| <b>Figure S8.</b> Disruption of salt bridge interaction between Arg66 and propionate in Cpd 0 state for 500 ns of simulation time.      | <b>S7</b> |
| <b>Figure S9.</b> QM/MM optimized geometries for the Cpd 0 $\rightarrow$ Cpd I formation via Arg245                                     | <b>S8</b> |
| Coordinates of atoms in the QM region obtained from the QM/MM optimized geometries                                                      | <b>S8</b> |

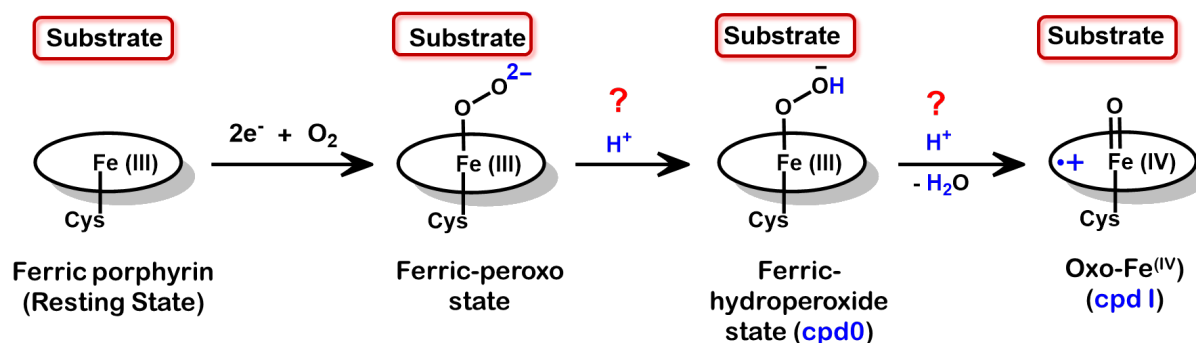

**Scheme S1.** Generic steps involved for the Cpd I formation in the monooxygenase activity in CYP450s. Consumption of two electrons (from the reductase partner) and one molecular oxygen converts the ferric porphyrin state to the ferric-peroxo state. Afterward, the subsequent protonation leads to the conversion of ferric-peroxo  $\rightarrow$  Cpd 0  $\rightarrow$  Cpd I. It is important to note that the source of protons, i.e., acid-alcohol pair (in monooxygenases), is absent in CYP450 peroxygenases.

**Table S1.** Trajectory clustering analysis result of the 500 ns simulation of OleT-BM3R at ferric-peroxo heme state.

| Cluster | Population |
|---------|------------|
| C1      | 41%        |
| C2      | 37%        |
| C3      | 12%        |
| C4      | 6%         |
| C5      | 5%         |

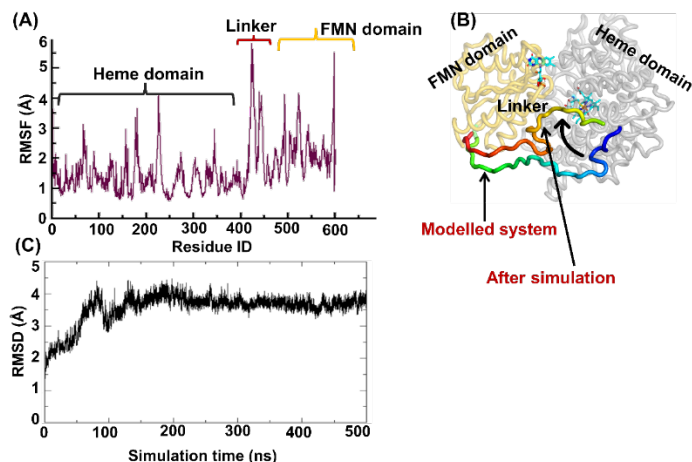

**Figure S1.** (A) Root mean square Fluctuation (RMSF) of whole complex (Heme domain +FMN domain) in peroxo-ferric state. (B) Pictorial representation of the most fluctuating region in OleT-BM3R. (B) Root mean square Deviation (RMSD) of whole complex (Heme domain +FMN domain) in peroxo-ferric state.

### Section S1: SPM Analysis:

The SPM is a python program, as introduced by Romero-Rivera et al. in 2017 (reference 50). It **involves constructing a path based on calculated mean distances and correlation values**. Subsequently, it employs the Dijkstra algorithm within the igraph module to determine the shortest path lengths. The algorithm systematically goes all nodes in the graph, pinpointing the shortest path from the first to the last protein residue. This method reveals the graph's edges that are shorter, indicating higher correlation and centrality in the communication pathway. Only those edges with a significant contribution are depicted, and their representation is weighted in proportion to their contribution.

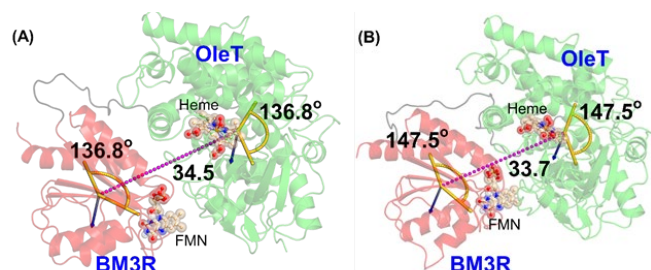

**Figure S2:** Variation in distance and angle between Heme binding domain (OleT) and reductase binding domain (BM3R) at the initial (A) and final (B) frame of MD simulation.

**Table S2.** Interaction energy calculated for the C-helix and  $\alpha$ 1-helix by MMPBSA calculations.

| Energy Component | Energies (initial)       | Energies (final)  |
|------------------|--------------------------|-------------------|
| BOND             | 157.6202                 | 157.3773          |
| ANGLE            | 433.7778                 | 433.3059          |
| DIHED            | 613.6804                 | 598.3391          |
| VDWAALS          | -298.1813                | -306.5617         |
| EEL              | -2875.4961               | -2921.8208        |
| 1-4 VDW          | 175.423                  | 174.3922          |
| 1-4 EEL          | 2179.453                 | 2152.6855         |
| EGB              | -1473.999                | -1408.4109        |
| ESURF            | 34.7714                  | 34.4181           |
| G gas            | 386.277                  | 287.7174          |
| G solv           | -1439.2276               | -1373.9928        |
| <b>TOTAL</b>     | <b>-1052.9506</b>        | <b>-1086.2754</b> |
| Difference       | <b><i>33.32 kcal</i></b> |                   |

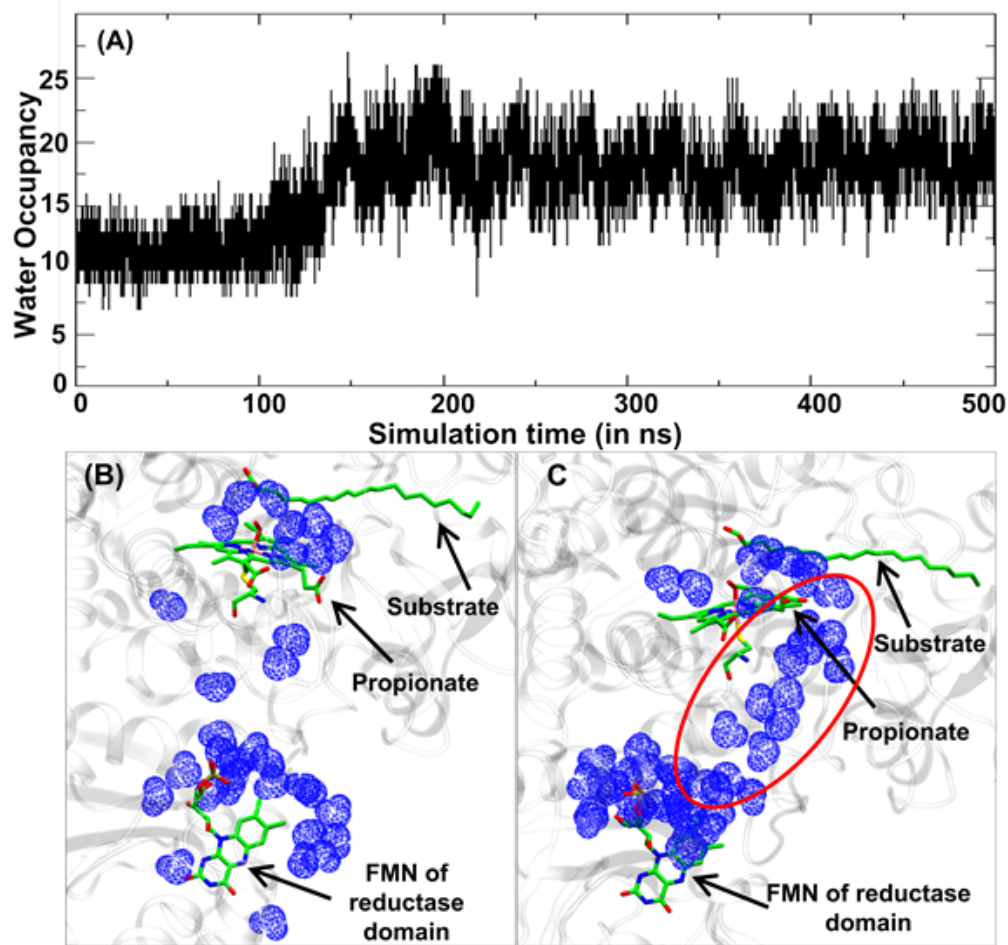

**Figure S3.** (A) Water occupancy near 5-8 Å range of heme. (B,C) Water population connecting the heme domain to the FMN binding reductase domain, at the initial (B) of MD simulation and after 200 ns (C) of MD simulation. The red highlighted part shows the connectivity of two domains via an organized water flow.

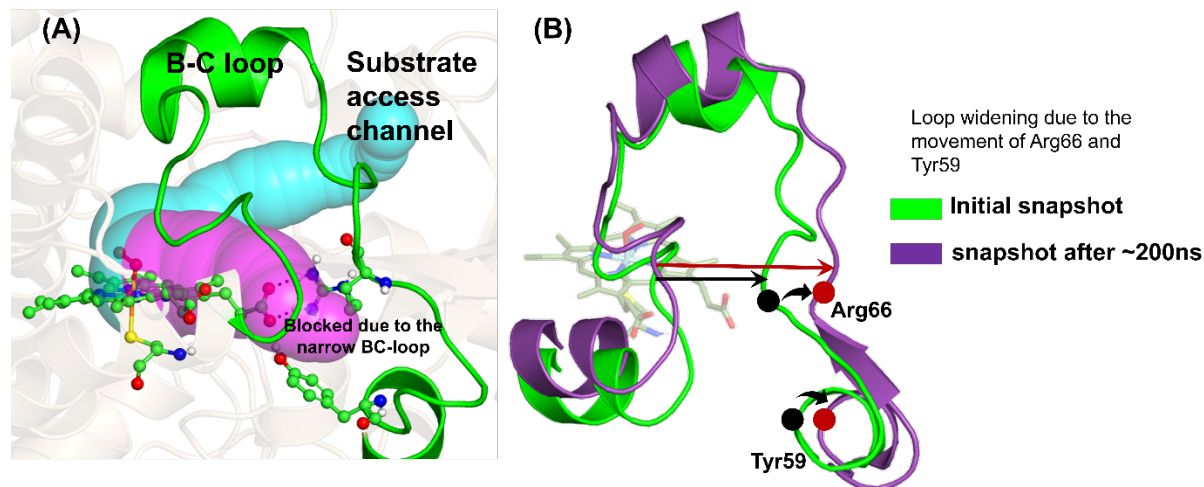

**Figure S4.** (A) Possible tunnels present at the axial site of the heme. Note that tunnels present at the propionate side is blocked due to the narrowness of BC-loop. (B) Widening of B-C loop due to the movement of Arg66 and Tyr59 residue near propionate.

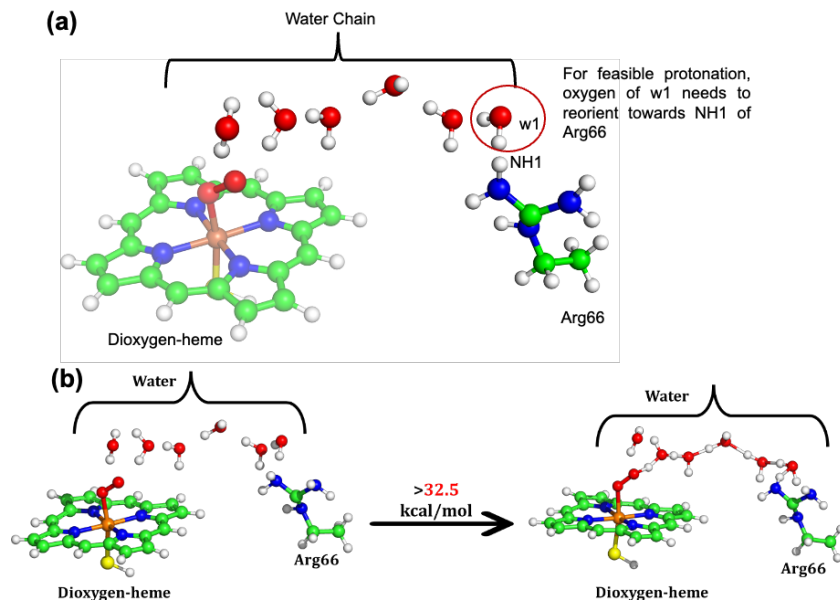

**Figure S5.** (a) Graphical representation of unfavorable protonation from Arg66. (b) Geometries obtained during potential energy surface scanning for the dioxygen  $\rightarrow$  Cpd 0 formation through Arg66. Note that the reorientation of water w1 is energetically demanding which makes the protonation from Arg66 pathway unfavorable.

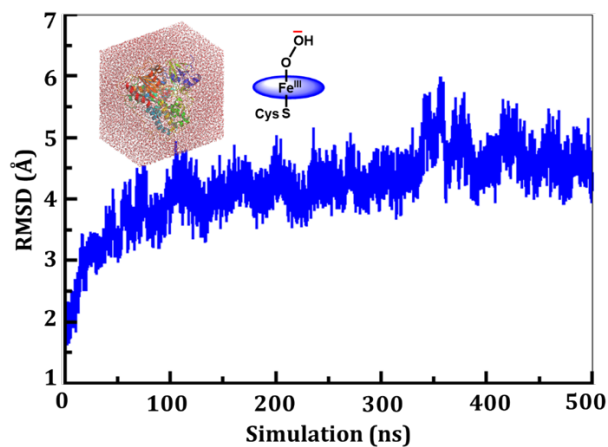

**Figure S6.** RMSD of OleT-BM3R in Cpd 0 state for 500 ns of simulation time.

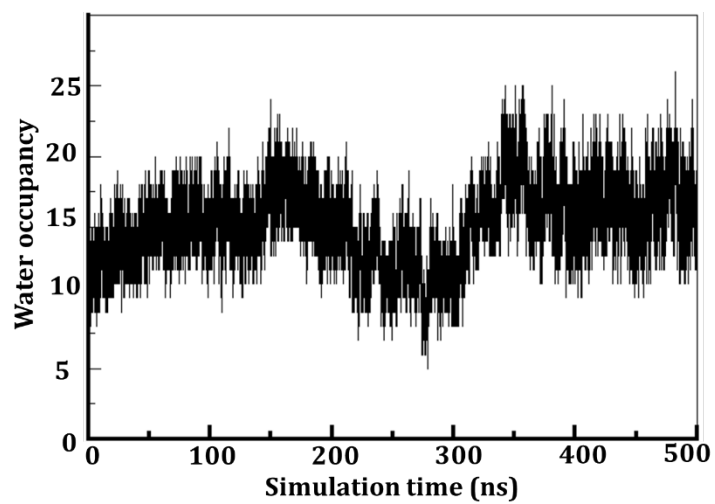

**Figure S7.** Water occupancy near 8 Å of heme in cpd 0 state of OleT-BM3R.

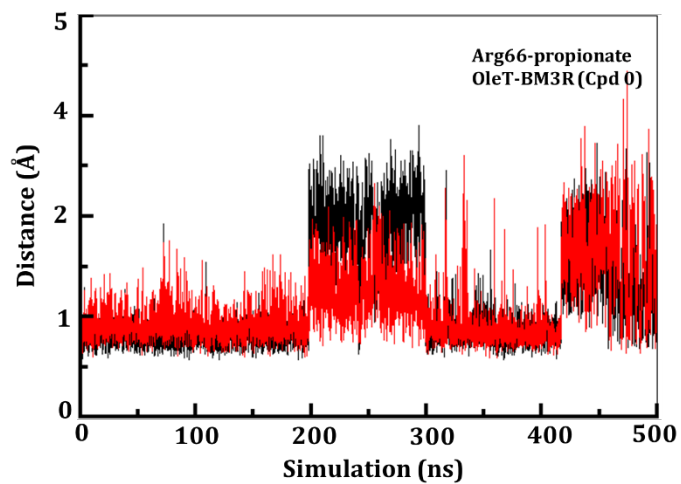

**Figure S8.** Disruption of salt bridge interaction between Arg66 and propionate in Cpd 0 state for 500 ns of simulation time.

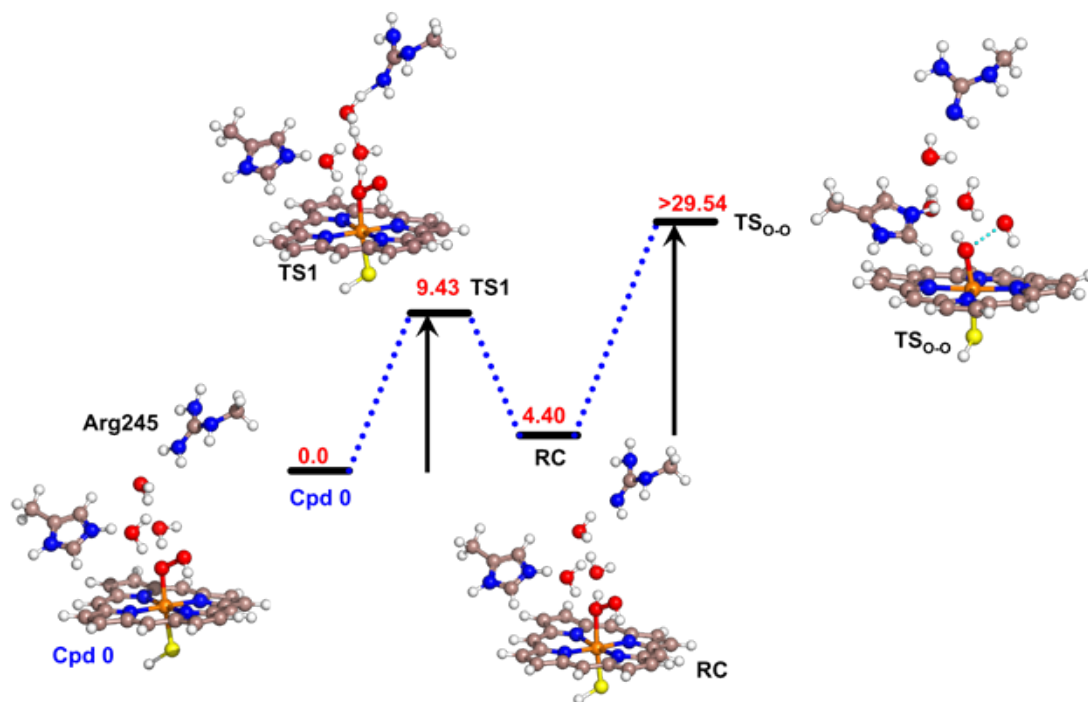

**Figure S9.** QM/MM optimized geometries for the Cpd 0  $\rightarrow$  Cpd I formation. Note that here Arg245 have been considered as the proton source. Energy profile diagram for the Cpd 0  $\rightarrow$  Cpd I formation. All energies are in kcal/mol.

**Coordinates of atoms in the QM region obtained from the QM/MM optimized geometries.**

|                                                                      |   |            |            |            |
|----------------------------------------------------------------------|---|------------|------------|------------|
| <b>Fe-OO<sup>2-</sup> to FeOOH<sup>-</sup> (Cpd 0 formation) via</b> | H | 59.2216088 | 59.3518374 | 53.7236758 |
| <b>His85</b>                                                         | N | 57.9131420 | 60.0846235 | 52.1178412 |
|                                                                      | H | 57.7964926 | 59.1209871 | 51.6455390 |
| <b>RC</b>                                                            | C | 57.4677504 | 61.3020502 | 51.6634343 |
| C                                                                    | H | 58.0158903 | 63.7641262 | 52.3023197 |
| H                                                                    | S | 57.8454601 | 63.9697284 | 51.2312206 |
| H                                                                    | N | 59.0358365 | 64.1170625 | 52.5265732 |
| C                                                                    | C | 57.9813438 | 62.2722514 | 52.4883341 |
| N                                                                    | C | 58.7191574 | 61.5765184 | 53.4393596 |
| H                                                                    | C | 59.1901458 | 62.0090499 | 54.2399625 |
| C                                                                    | C | 58.6808949 | 60.2462802 | 53.2031084 |
|                                                                      | C | 57.6612522 | 53.4809446 | 56.7222302 |



|    |            |            |            |           |            |            |            |
|----|------------|------------|------------|-----------|------------|------------|------------|
| C  | 57.3481264 | 56.0238183 | 56.6752945 | H         | 58.8607238 | 51.6148640 | 56.6024149 |
| H  | 56.2925661 | 55.8886498 | 56.9093728 | H         | 56.6302847 | 53.2212497 | 56.9625046 |
| C  | 57.7672182 | 57.3600408 | 56.6449539 | H         | 57.4255983 | 60.6052780 | 57.1941981 |
| N  | 59.0328838 | 57.7912428 | 56.3625814 | H         | 55.8428896 | 58.4782257 | 57.2219566 |
| C  | 59.0299351 | 59.1520976 | 56.4693887 | H         | 62.6266237 | 61.5049789 | 55.8359532 |
| C  | 57.7046847 | 59.6013390 | 56.8743788 | H         | 64.7289700 | 59.8595447 | 55.3304043 |
| C  | 56.9038971 | 58.4924028 | 56.9726994 | H         | 65.4474456 | 54.6151616 | 54.9322647 |
| C  | 60.1470140 | 59.9716066 | 56.2657539 | H         | 63.9416413 | 52.5069628 | 54.8433873 |
| H  | 60.0143975 | 61.0443335 | 56.4270025 | <b>PC</b> |            |            |            |
| C  | 61.4410274 | 59.5535101 | 55.9300107 | C         | 57.9288311 | 64.0119023 | 52.1726224 |
| C  | 62.6011749 | 60.4192967 | 55.7426062 | H         | 57.7674399 | 64.2888775 | 51.1155774 |
| C  | 63.1471730 | 58.2430833 | 55.5143177 | H         | 58.9668324 | 64.2844368 | 52.4217118 |
| N  | 61.8079027 | 58.2497419 | 55.7799174 | C         | 57.7417248 | 62.5321546 | 52.2942764 |
| C  | 63.6814480 | 59.6002619 | 55.4838226 | N         | 58.3856707 | 61.7436126 | 53.2197096 |
| C  | 63.9251103 | 57.0981740 | 55.3194722 | H         | 58.9639698 | 62.0930770 | 53.9873618 |
| H  | 64.9910900 | 57.2762979 | 55.1696618 | C         | 58.0504099 | 60.4473746 | 52.9800720 |
| C  | 63.5025012 | 55.7711098 | 55.3068264 | H         | 58.4730643 | 59.6126874 | 53.5451498 |
| C  | 64.3680631 | 54.6149070 | 55.0839244 | N         | 57.2155850 | 60.3620791 | 51.9595359 |
| N  | 62.2162087 | 55.3644731 | 55.5004964 | H         | 57.2480639 | 58.6280537 | 51.2892884 |
| C  | 62.2313283 | 53.9990849 | 55.4462366 | C         | 57.0136897 | 61.6440254 | 51.5260570 |
| C  | 61.1710993 | 53.2032782 | 55.8792391 | H         | 56.3795141 | 61.8568002 | 50.6637088 |
| H  | 61.3977591 | 52.1492863 | 56.0042021 | S         | 61.0172365 | 56.2227908 | 58.3648116 |
| Fe | 60.6043281 | 56.6081438 | 55.9381642 | N         | 59.5325335 | 54.8364600 | 56.2575562 |
| C  | 63.5697544 | 53.4996241 | 55.0971408 | C         | 59.9433039 | 53.5364474 | 56.2250567 |
| O  | 60.1796306 | 56.6834203 | 54.1378078 | C         | 58.2132476 | 54.8127757 | 56.6093189 |
| O  | 59.6875686 | 57.8639218 | 53.5222888 | C         | 58.8354793 | 52.6344033 | 56.5592627 |
| O  | 57.7830223 | 57.6817139 | 51.0709280 | C         | 57.7359686 | 53.4254455 | 56.7857325 |
| H  | 57.6396605 | 57.3583468 | 52.0068483 | C         | 57.4460385 | 55.9685942 | 56.7927856 |
| H  | 58.7493458 | 57.5023421 | 50.8864814 | H         | 56.3973074 | 55.8354931 | 57.0547080 |
| H  | 57.3056417 | 64.3741556 | 52.8604221 | C         | 57.8579940 | 57.3052512 | 56.7148636 |
| H  | 61.3286482 | 57.4292020 | 58.9628201 | N         | 59.1175827 | 57.7283501 | 56.3826348 |

|    |            |            |            |                                           |            |            |            |
|----|------------|------------|------------|-------------------------------------------|------------|------------|------------|
| C  | 59.1114377 | 59.0943045 | 56.4282096 | H                                         | 62.7035171 | 61.4213828 | 55.8709992 |
| C  | 57.7934159 | 59.5593772 | 56.8348709 | H                                         | 64.8770858 | 59.7419290 | 55.7343174 |
| C  | 57.0018783 | 58.4491611 | 57.0086371 | H                                         | 65.5769132 | 54.5057668 | 55.4806311 |
| C  | 60.2291787 | 59.9007518 | 56.1877493 | H                                         | 64.0443052 | 52.4517419 | 54.9472231 |
| H  | 60.0863075 | 60.9803450 | 56.2694500 | <b>Cpd 0 formation Pathway via Arg245</b> |            |            |            |
| C  | 61.5379570 | 59.4678610 | 55.9551096 | <b>RC</b>                                 |            |            |            |
| C  | 62.7100650 | 60.3318072 | 55.8418585 | C                                         | 58.1765507 | 52.9619535 | 47.1586218 |
| C  | 63.2788970 | 58.1476419 | 55.7869546 | H                                         | 59.0670665 | 52.9578464 | 47.7889875 |
| N  | 61.9180342 | 58.1581146 | 55.9010337 | H                                         | 58.1548215 | 52.0321799 | 46.5912121 |
| C  | 63.8133307 | 59.5055282 | 55.7589525 | C                                         | 58.2827141 | 54.1403489 | 46.1810661 |
| C  | 64.0658099 | 56.9945662 | 55.7060921 | H                                         | 59.1142652 | 53.9384800 | 45.5048584 |
| H  | 65.1452515 | 57.1496901 | 55.6644757 | H                                         | 57.3693666 | 54.2140949 | 45.5894716 |
| C  | 63.6245791 | 55.6758607 | 55.6335807 | N                                         | 58.5580349 | 55.3964178 | 46.8991391 |
| C  | 64.4879750 | 54.5153211 | 55.4338399 | H                                         | 59.4794496 | 55.4911904 | 47.3396942 |
| N  | 62.3201891 | 55.2844923 | 55.6828088 | C                                         | 57.7051729 | 56.3050911 | 47.3253905 |
| C  | 62.3158672 | 53.9247976 | 55.5314715 | N                                         | 56.4673248 | 56.3767356 | 46.9304169 |
| C  | 61.2264199 | 53.1213648 | 55.8627634 | H                                         | 56.1284632 | 55.7419676 | 46.2373426 |
| H  | 61.4259422 | 52.0557374 | 55.9076809 | H                                         | 55.8982543 | 57.1070526 | 47.3323913 |
| Fe | 60.7110970 | 56.5151035 | 56.0558434 | N                                         | 58.0779028 | 57.1723315 | 48.2020714 |
| C  | 63.6718883 | 53.4262511 | 55.2629834 | H                                         | 59.0229800 | 57.0960819 | 48.5982253 |
| O  | 60.2674024 | 56.5051326 | 54.1959280 | H                                         | 57.4046990 | 57.7413835 | 48.6960542 |
| O  | 60.4958380 | 57.7510988 | 53.4501449 | S                                         | 61.0526657 | 56.2455772 | 58.3092046 |
| O  | 57.4757241 | 57.6951700 | 51.1011473 | N                                         | 59.4486955 | 54.9048676 | 56.1947365 |
| H  | 57.5244185 | 57.3282341 | 52.0233868 | C                                         | 59.8793300 | 53.6113309 | 56.2133833 |
| H  | 59.9104833 | 57.5843833 | 52.6919483 | C                                         | 58.1256820 | 54.8699026 | 56.5170722 |
| H  | 57.2419805 | 64.6020081 | 52.7793172 | C                                         | 58.7774817 | 52.7002623 | 56.5472018 |
| H  | 61.3041983 | 57.4112373 | 59.0048077 | C                                         | 57.6612522 | 53.4809446 | 56.7222302 |
| H  | 58.9072743 | 51.5474548 | 56.5974169 | C                                         | 57.3481264 | 56.0238183 | 56.6752945 |
| H  | 56.7067846 | 53.1718567 | 57.0397799 | H                                         | 56.2925661 | 55.8886498 | 56.9093728 |
| H  | 57.5237915 | 60.5725853 | 57.1328295 | C                                         | 57.7672182 | 57.3600408 | 56.6449539 |
| H  | 55.9494560 | 58.4475412 | 57.2923124 | N                                         | 59.0328838 | 57.7912428 | 56.3625814 |

|    |            |            |            |           |            |            |            |
|----|------------|------------|------------|-----------|------------|------------|------------|
| C  | 59.0299351 | 59.1520976 | 56.4693887 | H         | 62.6266237 | 61.5049789 | 55.8359532 |
| C  | 57.7046847 | 59.6013390 | 56.8743788 | H         | 64.7289700 | 59.8595447 | 55.3304043 |
| C  | 56.9038971 | 58.4924028 | 56.9726994 | H         | 65.4474456 | 54.6151616 | 54.9322647 |
| C  | 60.1470140 | 59.9716066 | 56.2657539 | H         | 63.9416413 | 52.5069628 | 54.8433873 |
| H  | 60.0143975 | 61.0443335 | 56.4270025 | <b>PC</b> |            |            |            |
| C  | 61.4410274 | 59.5535101 | 55.9300107 | C         | 58.4509957 | 53.2672326 | 47.3007309 |
| C  | 62.6011749 | 60.4192967 | 55.7426062 | H         | 59.3163708 | 53.2123358 | 47.9809129 |
| C  | 63.1471730 | 58.2430833 | 55.5143177 | H         | 58.4593740 | 52.3487351 | 46.6875195 |
| N  | 61.8079027 | 58.2497419 | 55.7799174 | C         | 58.6304655 | 54.4915433 | 46.3822234 |
| C  | 63.6814480 | 59.6002619 | 55.4838226 | H         | 59.4436087 | 54.2392717 | 45.6799780 |
| C  | 63.9251103 | 57.0981740 | 55.3194722 | H         | 57.7319447 | 54.6443211 | 45.7576615 |
| H  | 64.9910900 | 57.2762979 | 55.1696618 | N         | 59.0073669 | 55.7397187 | 47.0304805 |
| C  | 63.5025012 | 55.7711098 | 55.3068264 | H         | 59.9410147 | 55.7037593 | 47.4777483 |
| C  | 64.3680631 | 54.6149070 | 55.0839244 | C         | 58.1365545 | 56.5386101 | 47.7495688 |
| N  | 62.2162087 | 55.3644731 | 55.5004964 | N         | 56.7983916 | 56.5105619 | 47.3471205 |
| C  | 62.2313283 | 53.9990849 | 55.4462366 | H         | 56.6390358 | 56.3896584 | 46.3518183 |
| C  | 61.1710993 | 53.2032782 | 55.8792391 | H         | 56.2991032 | 57.3098763 | 47.7405900 |
| H  | 61.3977591 | 52.1492863 | 56.0042021 | N         | 58.4663934 | 57.2912210 | 48.7419257 |
| Fe | 60.6043281 | 56.6081438 | 55.9381642 | H         | 59.4633410 | 57.2075734 | 49.0049216 |
| C  | 63.5697544 | 53.4996241 | 55.0971408 | H         | 57.7945646 | 57.3365631 | 50.3445301 |
| O  | 60.1796306 | 56.6834203 | 54.1378078 | S         | 60.9949659 | 56.1921448 | 58.4431162 |
| O  | 59.6875686 | 57.8639218 | 53.5222888 | N         | 59.4192060 | 54.7294533 | 56.4290144 |
| O  | 57.7830223 | 57.6817139 | 51.0709280 | C         | 59.8300907 | 53.4317880 | 56.3850626 |
| H  | 57.6396605 | 57.3583468 | 52.0068483 | C         | 58.0964066 | 54.7040751 | 56.7616698 |
| H  | 58.7493458 | 57.5023421 | 50.8864814 | C         | 58.7121163 | 52.5241042 | 56.6684492 |
| H  | 57.2794817 | 53.0204952 | 47.7749879 | C         | 57.6119959 | 53.3131694 | 56.8961739 |
| H  | 61.3286482 | 57.4292020 | 58.9628201 | C         | 57.3360321 | 55.8571613 | 56.9815562 |
| H  | 58.8607238 | 51.6148640 | 56.6024149 | H         | 56.2995807 | 55.7150089 | 57.2833802 |
| H  | 56.6302847 | 53.2212497 | 56.9625046 | C         | 57.7373502 | 57.1977738 | 56.9034945 |
| H  | 57.4255983 | 60.6052780 | 57.1941981 | N         | 58.9769637 | 57.6326844 | 56.5144736 |
| H  | 55.8428896 | 58.4782257 | 57.2219566 | C         | 58.9664075 | 58.9994190 | 56.5838316 |

|    |            |            |            |                                  |            |            |            |
|----|------------|------------|------------|----------------------------------|------------|------------|------------|
| C  | 57.6618124 | 59.4522822 | 57.0393552 | H                                | 64.6569034 | 59.6964467 | 55.4443315 |
| C  | 56.8847883 | 58.3355225 | 57.2391399 | H                                | 65.4231041 | 54.4597852 | 55.3108270 |
| C  | 60.0719100 | 59.8229095 | 56.3217235 | H                                | 63.9211340 | 52.3513727 | 55.0675644 |
| H  | 59.9282148 | 60.9008252 | 56.4311257 | <b>Cpd 0 formation via Arg66</b> |            |            |            |
| C  | 61.3603230 | 59.3984799 | 55.9847156 | <b>RC</b>                        |            |            |            |
| C  | 62.5203292 | 60.2636831 | 55.7914150 | C                                | 62.7486645 | 69.3617440 | 57.1121149 |
| C  | 63.0771807 | 58.0808867 | 55.6410603 | H                                | 62.4789127 | 70.0354693 | 56.2806275 |
| N  | 61.7303361 | 58.0881878 | 55.8700547 | H                                | 63.8152304 | 69.1062118 | 57.0113086 |
| C  | 63.6064351 | 59.4396414 | 55.5808395 | C                                | 61.8974378 | 68.0979400 | 56.9651007 |
| C  | 63.8681254 | 56.9343363 | 55.5286971 | H                                | 62.1763618 | 67.3665920 | 57.7410841 |
| H  | 64.9363136 | 57.1107826 | 55.3979347 | H                                | 60.8361912 | 68.3493689 | 57.1340100 |
| C  | 63.4555719 | 55.6045874 | 55.5607370 | N                                | 62.0525132 | 67.4676928 | 55.6459051 |
| C  | 64.3349562 | 54.4521476 | 55.3736190 | H                                | 62.4107193 | 66.5109998 | 55.7304508 |
| N  | 62.1688791 | 55.1886583 | 55.7267521 | C                                | 60.9763933 | 67.4846089 | 54.7435059 |
| C  | 62.1912109 | 53.8226403 | 55.6621769 | N                                | 60.6761666 | 68.7299281 | 54.0644912 |
| C  | 61.1243610 | 53.0199634 | 56.0584859 | H                                | 60.7856356 | 69.5229447 | 54.7056521 |
| H  | 61.3430462 | 51.9622372 | 56.1663717 | H                                | 59.6771466 | 68.7341782 | 53.8361874 |
| Fe | 60.5543323 | 56.4164640 | 56.1274523 | N                                | 60.9809176 | 66.3634246 | 53.8447827 |
| C  | 63.5407288 | 53.3354595 | 55.3413020 | H                                | 60.0668026 | 66.3083997 | 53.3813484 |
| O  | 60.0942601 | 56.2704822 | 54.3008793 | H                                | 61.0890937 | 65.5108720 | 54.4094288 |
| O  | 59.6192882 | 57.4492354 | 53.5871799 | S                                | 60.9651893 | 56.2001586 | 58.4173130 |
| O  | 57.6141771 | 57.4474263 | 51.3196585 | N                                | 59.4110121 | 54.7756203 | 56.3604397 |
| H  | 57.0100350 | 56.7544045 | 51.6294879 | C                                | 59.8240404 | 53.4750000 | 56.3467361 |
| H  | 59.1842721 | 57.0497987 | 52.8079057 | C                                | 58.0748428 | 54.7521961 | 56.6476098 |
| H  | 57.5249297 | 53.2624964 | 47.8755756 | C                                | 58.7037278 | 52.5734267 | 56.6256822 |
| H  | 61.2761660 | 57.3964490 | 59.0554275 | C                                | 57.5949513 | 53.3646294 | 56.8066705 |
| H  | 58.7746692 | 51.4365205 | 56.6321741 | C                                | 57.2982674 | 55.9078334 | 56.7849280 |
| H  | 56.5760257 | 53.0574460 | 57.1185212 | H                                | 56.2413255 | 55.7749859 | 57.0110417 |
| H  | 57.3845743 | 60.4670099 | 57.3248968 | C                                | 57.7129815 | 57.2444273 | 56.7332908 |
| H  | 55.8398332 | 58.3400951 | 57.5491643 | N                                | 58.9860647 | 57.6685693 | 56.4569649 |
| H  | 62.5420859 | 61.3501918 | 55.8756326 | C                                | 58.9865936 | 59.0339155 | 56.5702239 |

|    |            |            |            |           |            |            |            |
|----|------------|------------|------------|-----------|------------|------------|------------|
| C  | 57.6628763 | 59.4925989 | 56.9569205 | H         | 64.9589692 | 63.6594844 | 52.3148774 |
| C  | 56.8560345 | 58.3839439 | 57.0455293 | H         | 64.6405854 | 64.4769088 | 53.6284607 |
| C  | 60.1049989 | 59.8532706 | 56.3750641 | O         | 58.2483599 | 57.6468547 | 51.1894335 |
| H  | 59.9692504 | 60.9281667 | 56.5114548 | H         | 58.5913164 | 57.3358534 | 52.0637938 |
| C  | 61.3921978 | 59.4217210 | 56.0530650 | H         | 59.0896460 | 57.6128386 | 50.6642271 |
| C  | 62.5543087 | 60.2833145 | 55.8783583 | O         | 64.3420949 | 62.3913279 | 51.3331524 |
| C  | 63.1001851 | 58.1051502 | 55.6600286 | H         | 64.0997007 | 61.5084655 | 51.7589774 |
| N  | 61.7537289 | 58.1086547 | 55.9028478 | H         | 63.4793773 | 62.7081926 | 51.0303018 |
| C  | 63.6317361 | 59.4628035 | 55.6287282 | H         | 62.6278129 | 69.8827021 | 58.0618858 |
| C  | 63.8836771 | 56.9621888 | 55.4990442 | H         | 61.2531021 | 57.3914435 | 59.0515793 |
| H  | 64.9495856 | 57.1394631 | 55.3555498 | H         | 58.7689885 | 51.4854026 | 56.6222258 |
| C  | 63.4598545 | 55.6361513 | 55.5048932 | H         | 56.5569139 | 53.1096045 | 57.0199957 |
| C  | 64.3231842 | 54.4829815 | 55.2842175 | H         | 57.3983229 | 60.4983713 | 57.2832645 |
| N  | 62.1692927 | 55.2279690 | 55.6895933 | H         | 55.7942434 | 58.3853722 | 57.2918312 |
| C  | 62.1846980 | 53.8574987 | 55.6228902 | H         | 62.5832098 | 61.3661028 | 56.0000192 |
| C  | 61.1179612 | 53.0593791 | 56.0275581 | H         | 64.6748901 | 59.7300214 | 55.4599339 |
| H  | 61.3372592 | 52.0031239 | 56.1465761 | H         | 65.4056796 | 54.4906915 | 55.1568934 |
| Fe | 60.5800532 | 56.4509050 | 56.1658149 | H         | 63.8960477 | 52.3803374 | 55.0032569 |
| C  | 63.5233482 | 53.3676156 | 55.2761012 | <b>TS</b> |            |            |            |
| O  | 60.0433521 | 56.3823169 | 54.2149993 | C         | 62.7841288 | 69.3261067 | 57.0545091 |
| O  | 59.6704127 | 57.4549735 | 53.5786132 | H         | 62.5414009 | 70.0005622 | 56.2152991 |
| O  | 63.0607180 | 66.2653056 | 51.9456828 | H         | 63.8489524 | 69.0532605 | 56.9797810 |
| H  | 63.7729087 | 65.6898519 | 52.2896402 | C         | 61.9141604 | 68.0722368 | 56.8959985 |
| H  | 62.3740301 | 66.2667444 | 52.6701361 | H         | 62.1362855 | 67.3652008 | 57.7110282 |
| O  | 61.1944328 | 58.9421184 | 51.7817161 | H         | 60.8527542 | 68.3538163 | 57.0026403 |
| H  | 60.8339536 | 58.4406259 | 52.5458865 | N         | 62.1023888 | 67.3669473 | 55.6075917 |
| H  | 60.9910886 | 58.3416382 | 51.0090242 | H         | 62.4006614 | 66.4018721 | 55.8043641 |
| O  | 63.5375959 | 60.1206075 | 52.3917313 | C         | 60.9881386 | 67.2634031 | 54.7140867 |
| H  | 63.5088876 | 60.0515955 | 53.3635578 | N         | 60.5698576 | 68.4759111 | 54.0518264 |
| H  | 62.7235651 | 59.6273396 | 52.0990112 | H         | 60.5593824 | 69.2802065 | 54.6889341 |
| O  | 65.2474987 | 64.4642441 | 52.8241261 | H         | 59.5993328 | 68.3176047 | 53.7598564 |

|   |            |            |            |    |            |            |            |
|---|------------|------------|------------|----|------------|------------|------------|
| N | 60.9740016 | 66.1451841 | 53.8467780 | Fe | 60.6049850 | 56.4607918 | 56.1829389 |
| H | 61.8303855 | 66.1874933 | 53.1994820 | C  | 63.5269248 | 53.3782095 | 55.2590181 |
| H | 61.0413746 | 65.2944072 | 54.4113745 | O  | 59.8754776 | 56.4706340 | 54.1872487 |
| S | 60.9502445 | 56.2024010 | 58.4114304 | O  | 59.6932764 | 57.4852845 | 53.3779869 |
| N | 59.4233908 | 54.7867049 | 56.3454373 | O  | 63.3197171 | 66.6379066 | 52.5911006 |
| C | 59.8317548 | 53.4831999 | 56.3277756 | H  | 63.8034486 | 65.7579064 | 52.5010989 |
| C | 58.0856806 | 54.7625997 | 56.6359576 | H  | 63.4484244 | 66.8964542 | 53.5235415 |
| C | 58.7120112 | 52.5842185 | 56.6082940 | O  | 61.1569472 | 58.8741775 | 52.2004163 |
| C | 57.6045608 | 53.3768929 | 56.7930212 | H  | 60.5930167 | 58.1840678 | 52.9772537 |
| C | 57.3089136 | 55.9162967 | 56.7755792 | H  | 61.0690020 | 58.3845040 | 51.3434180 |
| H | 56.2512143 | 55.7839828 | 56.9988383 | O  | 63.3371857 | 60.0795229 | 52.3900681 |
| C | 57.7208687 | 57.2516918 | 56.7226351 | H  | 63.4509054 | 60.1096530 | 53.3516941 |
| N | 58.9980108 | 57.6774855 | 56.4516495 | H  | 62.1602466 | 59.4001639 | 52.2818833 |
| C | 58.9927427 | 59.0442100 | 56.5616968 | O  | 64.7752881 | 64.4220902 | 52.5600228 |
| C | 57.6669334 | 59.5007282 | 56.9401101 | H  | 64.5040171 | 63.5286696 | 52.1409788 |
| C | 56.8623163 | 58.3894665 | 57.0272262 | H  | 64.4844360 | 64.3752671 | 53.5241393 |
| C | 60.1167203 | 59.8598482 | 56.3831093 | O  | 58.1894511 | 57.9411636 | 51.0762708 |
| H | 59.9826522 | 60.9341598 | 56.5184684 | H  | 58.3742640 | 57.5219046 | 51.9442308 |
| C | 61.4075576 | 59.4251692 | 56.0898894 | H  | 59.0950535 | 57.8493742 | 50.6611516 |
| C | 62.5771299 | 60.2824374 | 55.9563007 | O  | 64.0814378 | 62.2068856 | 51.3772517 |
| C | 63.1174452 | 58.1087890 | 55.7005535 | H  | 63.8050880 | 61.2452203 | 51.8544064 |
| N | 61.7649278 | 58.1094797 | 55.9233918 | H  | 63.2360569 | 62.4303276 | 50.9606376 |
| C | 63.6512180 | 59.4641616 | 55.7046779 | H  | 62.6552781 | 69.8501820 | 58.0015095 |
| C | 63.8989420 | 56.9693497 | 55.5263522 | H  | 61.2423615 | 57.3937988 | 59.0435587 |
| H | 64.9655224 | 57.1467677 | 55.3908657 | H  | 58.7755969 | 51.4960908 | 56.6097174 |
| C | 63.4706031 | 55.6447651 | 55.5081625 | H  | 56.5675234 | 53.1215618 | 57.0107978 |
| C | 64.3288312 | 54.4922954 | 55.2775284 | H  | 57.3989572 | 60.5022221 | 57.2766601 |
| N | 62.1763269 | 55.2402007 | 55.6834787 | H  | 55.8001689 | 58.3878388 | 57.2719864 |
| C | 62.1900808 | 53.8667297 | 55.6059355 | H  | 62.6171510 | 61.3604031 | 56.1126824 |
| C | 61.1238376 | 53.0666853 | 56.0034213 | H  | 64.6932618 | 59.7328857 | 55.5314746 |
| H | 61.3427298 | 52.0092191 | 56.1151756 | H  | 65.4115041 | 54.4968604 | 55.1515695 |

|                                           |            |            |            |    |            |            |            |
|-------------------------------------------|------------|------------|------------|----|------------|------------|------------|
| H                                         | 63.9007071 | 52.3920244 | 54.9837130 | C  | 46.9927598 | 45.3235241 | 42.3929007 |
| <b>Cpd 0 to Cpd I formation via His85</b> |            |            |            | C  | 45.9180161 | 46.1655604 | 42.5553252 |
| <b>Cpd 0</b>                              |            |            |            | C  | 45.7337061 | 48.7060769 | 42.4862027 |
| C                                         | 46.5099010 | 56.6465712 | 39.2488308 | H  | 44.6512039 | 48.6338526 | 42.5784968 |
| H                                         | 45.7268775 | 56.4667960 | 38.4962771 | C  | 46.2320384 | 50.0090018 | 42.5024265 |
| H                                         | 47.2394040 | 57.3286511 | 38.7705314 | N  | 47.5594578 | 50.3474692 | 42.5083964 |
| C                                         | 47.2397223 | 55.3592699 | 39.4755545 | C  | 47.6147639 | 51.7041164 | 42.6816078 |
| N                                         | 48.4544017 | 55.2858833 | 40.1461085 | C  | 46.2729467 | 52.2563642 | 42.7395025 |
| H                                         | 48.9252562 | 56.0510113 | 40.6556566 | C  | 45.4048184 | 51.1996548 | 42.6346687 |
| C                                         | 48.9757306 | 54.0614377 | 39.9809615 | C  | 48.7996674 | 52.4351682 | 42.7925888 |
| H                                         | 49.9110989 | 53.7010293 | 40.4044647 | H  | 48.7159802 | 53.4831209 | 43.0710713 |
| N                                         | 48.1498091 | 53.3452392 | 39.2300431 | C  | 50.0849462 | 51.9359795 | 42.5853710 |
| H                                         | 48.4196664 | 52.3495067 | 38.8698645 | C  | 51.2951849 | 52.7400277 | 42.5511686 |
| C                                         | 47.0606688 | 54.1196667 | 38.9056029 | C  | 51.7419320 | 50.5615134 | 42.1962957 |
| H                                         | 46.2798321 | 53.7303957 | 38.2581877 | N  | 50.3818599 | 50.6232847 | 42.3380348 |
| C                                         | 45.8404196 | 46.9700339 | 32.4589503 | C  | 52.3354565 | 51.8825552 | 42.3274045 |
| H                                         | 46.5184458 | 46.7914199 | 31.6078666 | C  | 52.4750193 | 49.4081099 | 41.9346187 |
| H                                         | 44.8246387 | 47.0781160 | 32.0570813 | H  | 53.5560001 | 49.5345227 | 41.8780551 |
| N                                         | 46.2714427 | 48.1364470 | 33.2027379 | C  | 51.9743520 | 48.1198568 | 41.7418407 |
| H                                         | 47.1809654 | 48.0117893 | 33.7397152 | C  | 52.7747460 | 46.9628710 | 41.3973215 |
| C                                         | 45.4544917 | 49.0458626 | 33.7543266 | N  | 50.6525611 | 47.7707394 | 41.8202985 |
| N                                         | 44.1850599 | 49.2240052 | 33.3159408 | C  | 50.6001267 | 46.4015223 | 41.6269907 |
| H                                         | 43.9578926 | 48.9968907 | 32.3546415 | C  | 49.4459272 | 45.6656566 | 41.8935273 |
| H                                         | 43.6923341 | 50.0168359 | 33.7248482 | H  | 49.5640973 | 44.5918356 | 41.9649847 |
| N                                         | 45.8976522 | 49.7678779 | 34.7728687 | C  | 51.9210521 | 45.8843216 | 41.2715260 |
| H                                         | 46.8281113 | 49.5930845 | 35.2159616 | Fe | 49.0893647 | 49.0622436 | 42.2409916 |
| H                                         | 45.3439879 | 50.5431664 | 35.1345112 | O  | 48.8353102 | 49.4367676 | 40.3441342 |
| S                                         | 49.1256541 | 48.4780223 | 44.4894805 | H  | 49.9032098 | 47.9108111 | 40.0521528 |
| N                                         | 47.8204596 | 47.4796124 | 42.1915260 | O  | 49.2677099 | 48.3665277 | 39.4679123 |
| C                                         | 48.1657304 | 46.1578211 | 42.1599888 | O  | 48.3940461 | 49.4788402 | 35.9674515 |
| C                                         | 46.4674783 | 47.5183205 | 42.4094350 | C  | 48.8908857 | 48.3747904 | 35.5868723 |

O 48.4368072 47.6726524 34.6477888  
 C 50.1375846 47.8482292 36.3321927  
 C 51.2310878 48.9164752 36.5471491  
 C 52.3770193 48.5374104 37.5226353  
 C 53.4576495 49.6355840 37.6888144  
 O 46.4491431 51.4804534 37.0582185  
 H 47.2425349 51.0883987 36.6582398  
 H 46.3739849 50.9294639 37.8944960  
 O 49.2470312 51.1197439 38.4840240  
 H 49.1860063 50.5279568 39.3226195  
 H 48.9174257 50.5135311 37.7920238  
 H 46.0528404 57.1385843 40.1073679  
 H 45.8655839 46.0694911 33.0725108  
 H 49.6891562 49.4856321 45.2454800  
 H 46.9952537 44.2409468 42.2660652  
 H 44.8717265 45.9659184 42.7866003  
 H 46.0272752 53.3119376 42.8555944  
 H 44.3180935 51.2296727 42.5559599  
 H 51.3607781 53.8241252 42.6433490  
 H 53.3930441 52.1250812 42.2236900  
 H 53.8604444 46.9932076 41.3056380  
 H 52.2490820 44.9094990 40.9107152  
 H 49.7800594 47.5005404 37.3013962  
 H 50.5326044 46.9775704 35.8087618  
 H 51.6517201 49.1957235 35.5811491  
 H 50.7487118 49.8179451 36.9249488  
 H 51.9393685 48.3074465 38.4940495  
 H 52.8514380 47.6127052 37.1941319  
 H 54.2645382 49.2856377 38.3326587  
 H 53.9111730 49.8708381 36.7259857  
 H 53.0777202 50.5625382 38.1183220

**TS1**

C 46.5134641 56.6029077 39.2669113  
 H 45.7317047 56.4054730 38.5171696  
 H 47.2373316 57.2829774 38.7763450  
 C 47.2555204 55.3244292 39.5131925  
 N 48.4794719 55.2808558 40.1668423  
 H 48.9474444 56.0598617 40.6548297  
 C 49.0092804 54.0539589 40.0076114  
 H 49.9575850 53.7204739 40.4232698  
 N 48.1903646 53.3044152 39.2867092  
 H 48.5605989 52.1850094 38.9250885  
 C 47.0907809 54.0677962 38.9697196  
 H 46.3049338 53.6679873 38.3345939  
 C 45.8665616 46.9707528 32.4809679  
 H 46.5558272 46.7960632 31.6381265  
 H 44.8567020 47.0852352 32.0653871  
 N 46.2945700 48.1282247 33.2408426  
 H 47.1903928 47.9899857 33.7960669  
 C 45.4751468 49.0413847 33.7833840  
 N 44.2156878 49.2317513 33.3202920  
 H 44.0109024 49.0201208 32.3503310  
 H 43.7212902 50.0266610 33.7236308  
 N 45.9050119 49.7521497 34.8149432  
 H 46.8273739 49.5701693 35.2718453  
 H 45.3624173 50.5405497 35.1638962  
 S 49.1278299 48.5002577 44.4488595  
 N 47.7985121 47.5059196 42.1786519  
 C 48.1424185 46.1830755 42.1524878  
 C 46.4458705 47.5475172 42.4013763  
 C 46.9702374 45.3516014 42.3968577  
 C 45.8964340 46.1959664 42.5573594



|    |            |            |            |           |            |            |            |
|----|------------|------------|------------|-----------|------------|------------|------------|
| C  | 45.7135306 | 48.7349921 | 42.4696980 | C         | 51.1594937 | 48.9343847 | 36.7367604 |
| H  | 44.6308286 | 48.6644701 | 42.5582520 | C         | 52.2425582 | 48.5798974 | 37.7890046 |
| C  | 46.2146777 | 50.0359942 | 42.4809908 | C         | 53.3311492 | 49.6688676 | 37.9603305 |
| N  | 47.5430788 | 50.3735591 | 42.4950341 | O         | 46.5408472 | 51.4662382 | 37.0525274 |
| C  | 47.5985657 | 51.7325410 | 42.6601488 | H         | 47.3085115 | 51.0268590 | 36.6512165 |
| C  | 46.2582287 | 52.2852790 | 42.7089450 | H         | 46.4141417 | 50.9162806 | 37.8815357 |
| C  | 45.3895019 | 51.2284762 | 42.6024918 | O         | 49.2166392 | 51.1366578 | 38.6746964 |
| C  | 48.7814353 | 52.4628564 | 42.7698437 | H         | 49.0835901 | 50.4487723 | 39.5322860 |
| H  | 48.6986256 | 53.5140090 | 43.0325908 | H         | 48.8460772 | 50.5981004 | 37.9513689 |
| C  | 50.0623284 | 51.9600986 | 42.5618707 | H         | 46.0541324 | 57.1071096 | 40.1171242 |
| C  | 51.2747749 | 52.7591650 | 42.5369633 | H         | 45.8778117 | 46.0651631 | 33.0874725 |
| C  | 51.7151881 | 50.5834233 | 42.1555032 | H         | 49.6889618 | 49.5138117 | 45.1986507 |
| N  | 50.3544009 | 50.6467109 | 42.2989038 | H         | 46.9725678 | 44.2677274 | 42.2816234 |
| C  | 52.3123585 | 51.9007848 | 42.3048878 | H         | 44.8504581 | 45.9990448 | 42.7923558 |
| C  | 52.4448947 | 49.4339965 | 41.8750572 | H         | 46.0128019 | 53.3397694 | 42.8349718 |
| H  | 53.5250473 | 49.5590839 | 41.8093800 | H         | 44.3032331 | 51.2582542 | 42.5176354 |
| C  | 51.9403333 | 48.1495076 | 41.6795517 | H         | 51.3448219 | 53.8418801 | 42.6413113 |
| C  | 52.7352922 | 46.9931165 | 41.3276490 | H         | 53.3710190 | 52.1411548 | 42.2072796 |
| N  | 50.6172245 | 47.8011684 | 41.7697423 | H         | 53.8210354 | 47.0193672 | 41.2352386 |
| C  | 50.5639909 | 46.4287631 | 41.5824756 | H         | 52.2048450 | 44.9376116 | 40.8527827 |
| C  | 49.4184513 | 45.6906087 | 41.8727289 | H         | 49.7417186 | 47.4154658 | 37.3531816 |
| H  | 49.5428006 | 44.6180544 | 41.9522001 | H         | 50.5664089 | 47.0161775 | 35.8660642 |
| C  | 51.8800138 | 45.9137142 | 41.2130264 | H         | 51.6379497 | 49.2406611 | 35.8065229 |
| Fe | 49.0677310 | 49.0855718 | 42.2391252 | H         | 50.6270783 | 49.8169032 | 37.0913901 |
| O  | 48.7524320 | 49.4352982 | 40.3274042 | H         | 51.7489612 | 48.4029097 | 38.7445696 |
| H  | 49.8243929 | 47.9161223 | 40.0355496 | H         | 52.7182187 | 47.6335650 | 37.5315765 |
| O  | 49.1915963 | 48.3761416 | 39.4492866 | H         | 54.0674545 | 49.3584966 | 38.7016748 |
| O  | 48.3772742 | 49.4646529 | 36.0306820 | H         | 53.8718189 | 49.8126314 | 37.0248759 |
| C  | 48.8752760 | 48.3563066 | 35.6667881 | H         | 52.9439604 | 50.6372665 | 38.2771198 |
| O  | 48.4198036 | 47.6368180 | 34.7418026 | <b>RC</b> |            |            |            |
| C  | 50.1198267 | 47.8397919 | 36.4231017 | C         | 46.4560213 | 56.4774987 | 39.3768866 |

|   |            |            |            |    |            |            |            |
|---|------------|------------|------------|----|------------|------------|------------|
| H | 45.7649635 | 55.6591746 | 39.1428459 | C  | 46.2243426 | 50.0635349 | 42.5488267 |
| H | 46.4830556 | 57.0954769 | 38.4562423 | N  | 47.5582514 | 50.3926743 | 42.5305695 |
| C | 47.7758359 | 55.8063913 | 39.5843277 | C  | 47.6209888 | 51.7582667 | 42.6842829 |
| N | 48.9697633 | 56.3788883 | 39.9694367 | C  | 46.2845459 | 52.3137946 | 42.7539797 |
| H | 49.1452416 | 57.2938878 | 40.3992383 | C  | 45.4096255 | 51.2582597 | 42.6775913 |
| C | 49.9311695 | 55.4215234 | 39.8906279 | C  | 48.8084544 | 52.4848060 | 42.7724442 |
| H | 50.9617578 | 55.6193194 | 40.1807500 | H  | 48.7319196 | 53.5449308 | 42.9967067 |
| N | 49.4400413 | 54.2742602 | 39.4665179 | C  | 50.0877039 | 51.9683845 | 42.6005577 |
| H | 49.7735939 | 52.4754113 | 39.2645108 | C  | 51.3080194 | 52.7527524 | 42.5995118 |
| C | 48.0998679 | 54.4993767 | 39.2764278 | C  | 51.7343443 | 50.5712441 | 42.2479258 |
| H | 47.4395812 | 53.7194787 | 38.8972485 | N  | 50.3706274 | 50.6440223 | 42.3659697 |
| C | 45.8191747 | 46.9338837 | 32.4495352 | C  | 52.3397346 | 51.8839076 | 42.3965428 |
| H | 46.4864817 | 46.7480854 | 31.5912424 | C  | 52.4565149 | 49.4153651 | 41.9761503 |
| H | 44.8018050 | 47.0635754 | 32.0588304 | H  | 53.5390792 | 49.5294860 | 41.9317423 |
| N | 46.2787199 | 48.0841382 | 33.2019562 | C  | 51.9403401 | 48.1405548 | 41.7517199 |
| H | 47.1700804 | 47.8993699 | 33.7569761 | C  | 52.7246312 | 46.9799881 | 41.3998414 |
| C | 45.4889529 | 49.0391755 | 33.7129130 | N  | 50.6052191 | 47.8096939 | 41.8058061 |
| N | 44.2185583 | 49.2263786 | 33.2786032 | C  | 50.5440027 | 46.4337344 | 41.6113528 |
| H | 43.9676321 | 48.9499603 | 32.3365918 | C  | 49.3904050 | 45.7032071 | 41.8830501 |
| H | 43.7453147 | 50.0474948 | 33.6509883 | H  | 49.5048244 | 44.6287845 | 41.9562262 |
| N | 45.9554891 | 49.8016654 | 34.6933138 | C  | 51.8591441 | 45.9105767 | 41.2607740 |
| H | 46.9193651 | 49.6477444 | 35.0859102 | Fe | 49.0774606 | 49.0951030 | 42.3274936 |
| H | 45.4085341 | 50.6106582 | 34.9792560 | O  | 48.7998312 | 49.5052153 | 40.2412461 |
| S | 49.0985513 | 48.4931234 | 44.4975383 | H  | 49.9917879 | 48.0835878 | 40.0440343 |
| N | 47.7852807 | 47.5309382 | 42.2084174 | O  | 49.4175959 | 48.5321334 | 39.3822132 |
| C | 48.1168471 | 46.2035837 | 42.1621375 | O  | 48.4493681 | 49.3637260 | 35.6746192 |
| C | 46.4323917 | 47.5748274 | 42.4478380 | C  | 48.8954536 | 48.1968846 | 35.4696946 |
| C | 46.9402513 | 45.3781721 | 42.3954554 | O  | 48.3893078 | 47.3854523 | 34.6573232 |
| C | 45.8742622 | 46.2269641 | 42.5814144 | C  | 50.1376580 | 47.7457102 | 36.2687113 |
| C | 45.7123366 | 48.7664605 | 42.5442926 | C  | 51.1424397 | 48.8782620 | 36.5643496 |
| H | 44.6311735 | 48.7050437 | 42.6556022 | C  | 52.3717019 | 48.4881185 | 37.4287711 |

|              |            |            |            |   |            |            |            |
|--------------|------------|------------|------------|---|------------|------------|------------|
| C            | 53.4311130 | 49.6094633 | 37.5844805 | C | 47.7708543 | 55.6854386 | 39.7920137 |
| O            | 47.4871227 | 51.3572319 | 37.2572497 | N | 48.9436252 | 56.3874442 | 39.9761004 |
| H            | 47.9411022 | 50.6344829 | 36.7709689 | H | 49.0645121 | 57.3517263 | 40.2912300 |
| H            | 46.9752233 | 50.8569793 | 37.9562877 | C | 49.9748564 | 55.5037100 | 39.8834600 |
| O            | 49.6501242 | 51.5410127 | 38.9602016 | H | 51.0077056 | 55.8094006 | 40.0434228 |
| H            | 49.1970647 | 50.3849087 | 39.8774939 | N | 49.5428402 | 54.2831337 | 39.6363048 |
| H            | 48.8994149 | 51.5879001 | 38.3198879 | H | 49.9051150 | 52.4674410 | 39.4537241 |
| H            | 46.0148599 | 57.0604097 | 40.1853782 | C | 48.1755611 | 54.3799915 | 39.5818354 |
| H            | 45.8325874 | 46.0291166 | 33.0572224 | H | 47.5535510 | 53.5107079 | 39.3692171 |
| H            | 49.6628020 | 49.5036534 | 45.2490685 | C | 45.8800200 | 46.9671105 | 32.4513853 |
| H            | 46.9313884 | 44.2972736 | 42.2552880 | H | 46.5590787 | 46.7777994 | 31.6032959 |
| H            | 44.8285598 | 46.0325845 | 42.8197216 | H | 44.8685213 | 47.0952658 | 32.0436864 |
| H            | 46.0364419 | 53.3676648 | 42.8799530 | N | 46.3404788 | 48.1190041 | 33.1999442 |
| H            | 44.3221223 | 51.2921592 | 42.6123633 | H | 47.2695363 | 47.9517921 | 33.7046923 |
| H            | 51.3895305 | 53.8357824 | 42.6915401 | C | 45.5540949 | 49.0585941 | 33.7402468 |
| H            | 53.4006980 | 52.1144450 | 42.3002291 | N | 44.2693765 | 49.2300228 | 33.3354065 |
| H            | 53.8105659 | 46.9975819 | 41.3076275 | H | 44.0137774 | 48.9707200 | 32.3896469 |
| H            | 52.1795441 | 44.9346629 | 40.8960778 | H | 43.7967518 | 50.0471205 | 33.7186056 |
| H            | 49.7643797 | 47.3354544 | 37.2070186 | N | 46.0335109 | 49.8190478 | 34.7170301 |
| H            | 50.6113974 | 46.9173488 | 35.7419708 | H | 47.0112514 | 49.6758811 | 35.0850130 |
| H            | 51.4875345 | 49.2974860 | 35.6192423 | H | 45.4872482 | 50.6223087 | 35.0172553 |
| H            | 50.6090426 | 49.6854269 | 37.0663851 | S | 49.0181529 | 48.5694115 | 44.4098995 |
| H            | 52.0236566 | 48.1802587 | 38.4147497 | N | 47.6933984 | 47.6165650 | 42.1623733 |
| H            | 52.8522703 | 47.6043875 | 37.0090800 | C | 48.0294379 | 46.2859179 | 42.1320674 |
| H            | 54.2674460 | 49.2634571 | 38.1918469 | C | 46.3365254 | 47.6636830 | 42.4133999 |
| H            | 53.8454963 | 49.8748283 | 36.6118886 | C | 46.8587011 | 45.4684914 | 42.3839674 |
| H            | 53.0470829 | 50.5217907 | 38.0408210 | C | 45.7898509 | 46.3197753 | 42.5677841 |
| <b>TSo-o</b> |            |            |            | C | 45.6082393 | 48.8476685 | 42.5073838 |
| C            | 46.3778367 | 56.2122442 | 39.6522431 | H | 44.5267010 | 48.7821590 | 42.6062669 |
| H            | 45.7553504 | 55.3087922 | 39.6939510 | C | 46.1210259 | 50.1405479 | 42.5216920 |
| H            | 46.2197743 | 56.6283745 | 38.6367318 | N | 47.4515725 | 50.4634338 | 42.5271867 |

|    |            |            |            |           |            |            |            |
|----|------------|------------|------------|-----------|------------|------------|------------|
| C  | 47.5263747 | 51.8259493 | 42.6591543 | H         | 48.1660708 | 50.5725320 | 36.8359047 |
| C  | 46.1907828 | 52.3898199 | 42.7244815 | H         | 47.1728464 | 50.8133224 | 37.9961066 |
| C  | 45.3109423 | 51.3401099 | 42.6444808 | O         | 49.7925073 | 51.5324942 | 39.1623155 |
| C  | 48.7153160 | 52.5470457 | 42.7258439 | H         | 49.2009890 | 50.3810962 | 40.0378810 |
| H  | 48.6451346 | 53.6105632 | 42.9304049 | H         | 49.0972230 | 51.5609578 | 38.4615869 |
| C  | 49.9876620 | 52.0247269 | 42.5386404 | H         | 45.9421750 | 56.9049139 | 40.3722950 |
| C  | 51.2063417 | 52.8044711 | 42.5349119 | H         | 45.8839908 | 46.0609216 | 33.0570857 |
| C  | 51.6414265 | 50.6292753 | 42.1569694 | H         | 49.6208422 | 49.5582199 | 45.1604798 |
| N  | 50.2780084 | 50.6989666 | 42.2961541 | H         | 46.8485403 | 44.3856516 | 42.2597826 |
| C  | 52.2401835 | 51.9370146 | 42.3179084 | H         | 44.7474468 | 46.1223257 | 42.8177331 |
| C  | 52.3639487 | 49.4828660 | 41.8623232 | H         | 45.9469739 | 53.4414318 | 42.8752691 |
| H  | 53.4437325 | 49.5994219 | 41.7890900 | H         | 44.2234296 | 51.3749130 | 42.5798892 |
| C  | 51.8372145 | 48.2161390 | 41.6451417 | H         | 51.2943090 | 53.8850895 | 42.6471299 |
| C  | 52.6115456 | 47.0554822 | 41.2660324 | H         | 53.3015506 | 52.1668330 | 42.2243647 |
| N  | 50.5129137 | 47.8833121 | 41.7550497 | H         | 53.6962238 | 47.0681442 | 41.1593553 |
| C  | 50.4384503 | 46.5163321 | 41.5492123 | H         | 52.0515799 | 45.0108843 | 40.7865821 |
| C  | 49.2975474 | 45.7819874 | 41.8496107 | H         | 49.9022314 | 47.2630575 | 36.9987995 |
| H  | 49.4184543 | 44.7097345 | 41.9405566 | H         | 50.8062325 | 47.0407196 | 35.5272093 |
| C  | 51.7433272 | 45.9890202 | 41.1557672 | H         | 51.6208658 | 49.4048629 | 35.6605384 |
| Fe | 48.9821588 | 49.1732891 | 42.1568616 | H         | 50.6141983 | 49.6960008 | 37.0510090 |
| O  | 48.6799779 | 49.5877544 | 40.4228575 | H         | 51.9372258 | 48.2606283 | 38.4712836 |
| H  | 49.8138184 | 47.9116973 | 39.7257891 | H         | 52.8690277 | 47.6399695 | 37.1441506 |
| O  | 49.4272637 | 48.4617640 | 39.0220267 | H         | 54.2040851 | 49.3162553 | 38.4131397 |
| O  | 48.5496650 | 49.3880652 | 35.5988958 | H         | 53.9358325 | 49.8680180 | 36.7776612 |
| C  | 49.0279850 | 48.2469462 | 35.3414428 | H         | 53.0261611 | 50.5842444 | 38.1032063 |
| O  | 48.5428166 | 47.4613634 | 34.4890339 | <b>IM</b> |            |            |            |
| C  | 50.2778022 | 47.7872885 | 36.1200528 | C         | 46.4324732 | 56.3716576 | 39.4799995 |
| C  | 51.2130713 | 48.9326594 | 36.5542915 | H         | 45.7807202 | 55.4962933 | 39.3727723 |
| C  | 52.3711266 | 48.5377003 | 37.5105399 | H         | 46.3576485 | 56.9046453 | 38.5100786 |
| C  | 53.4321410 | 49.6484815 | 37.7190250 | C         | 47.7983166 | 55.7866991 | 39.6543687 |
| O  | 47.7441278 | 51.3032027 | 37.3390881 | N         | 48.9704858 | 56.4305243 | 39.9879082 |

|   |            |            |            |    |            |            |            |
|---|------------|------------|------------|----|------------|------------|------------|
| H | 49.1011147 | 57.3569763 | 40.4069727 | C  | 45.3334170 | 51.2814151 | 42.6953237 |
| C | 49.9791018 | 55.5215653 | 39.8998210 | C  | 48.7395452 | 52.4791521 | 42.8045050 |
| H | 51.0048594 | 55.7797865 | 40.1599978 | H  | 48.6724374 | 53.5394306 | 43.0275965 |
| N | 49.5390292 | 54.3404401 | 39.5144682 | C  | 50.0111951 | 51.9560792 | 42.6144607 |
| H | 49.8914763 | 52.4326962 | 39.3478166 | C  | 51.2291269 | 52.7352342 | 42.6086115 |
| C | 48.1839342 | 54.4910729 | 39.3635297 | C  | 51.6683052 | 50.5585899 | 42.2460069 |
| H | 47.5565691 | 53.6676503 | 39.0217399 | N  | 50.3005132 | 50.6297830 | 42.3723292 |
| C | 45.8302523 | 46.9669883 | 32.4055051 | C  | 52.2635391 | 51.8677799 | 42.3959314 |
| H | 46.4909320 | 46.7642908 | 31.5467340 | C  | 52.3952358 | 49.4087556 | 41.9822046 |
| H | 44.8051784 | 47.0542774 | 32.0232930 | H  | 53.4760624 | 49.5245556 | 41.9206262 |
| N | 46.2757893 | 48.1625698 | 33.0893940 | C  | 51.8688160 | 48.1383513 | 41.7786917 |
| H | 47.2714155 | 48.0920722 | 33.4705317 | C  | 52.6427110 | 46.9748167 | 41.4083046 |
| C | 45.4827138 | 49.0754970 | 33.6622398 | N  | 50.5463018 | 47.8097704 | 41.8856950 |
| N | 44.1773404 | 49.2024479 | 33.3108966 | C  | 50.4640956 | 46.4462068 | 41.6690714 |
| H | 43.8957574 | 48.9482303 | 32.3707744 | C  | 49.3119495 | 45.7175154 | 41.9424619 |
| H | 43.6874697 | 49.9910041 | 33.7296904 | H  | 49.4227562 | 44.6434130 | 42.0188443 |
| N | 45.9747202 | 49.8530673 | 34.6176709 | C  | 51.7704034 | 45.9136776 | 41.2849801 |
| H | 46.9526730 | 49.7073506 | 34.9816756 | Fe | 49.0017060 | 49.1172645 | 42.2121529 |
| H | 45.4222973 | 50.6520265 | 34.9200794 | O  | 48.7381778 | 49.4346962 | 40.4499807 |
| S | 49.0005697 | 48.5189236 | 44.5117183 | H  | 49.9676766 | 47.7145992 | 39.7418549 |
| N | 47.7053966 | 47.5540209 | 42.2430192 | O  | 49.8419471 | 48.2709994 | 38.9531622 |
| C | 48.0404414 | 46.2240439 | 42.2079752 | O  | 48.4805543 | 49.3758504 | 35.5108928 |
| C | 46.3464793 | 47.6023411 | 42.4730017 | C  | 49.0670068 | 48.3516804 | 35.0609235 |
| C | 46.8641205 | 45.4075994 | 42.4354531 | O  | 48.6946199 | 47.7212684 | 34.0375802 |
| C | 45.7946275 | 46.2597789 | 42.6115244 | C  | 50.3166751 | 47.8516319 | 35.8147180 |
| C | 45.6203249 | 48.7897237 | 42.5593027 | C  | 51.2812195 | 48.9812273 | 36.2366363 |
| H | 44.5380613 | 48.7285057 | 42.6528503 | C  | 52.5067439 | 48.5452991 | 37.0853102 |
| C | 46.1384955 | 50.0796363 | 42.5727325 | C  | 53.5325181 | 49.6731148 | 37.3610585 |
| N | 47.4722767 | 50.3995144 | 42.5808656 | O  | 47.6425015 | 51.3081615 | 37.2694853 |
| C | 47.5494875 | 51.7609985 | 42.7209315 | H  | 48.0743285 | 50.5839521 | 36.7686753 |
| C | 46.2160991 | 52.3278211 | 42.7799313 | H  | 47.1250793 | 50.8131641 | 37.9665999 |

|                                  |            |            |            |   |            |            |            |
|----------------------------------|------------|------------|------------|---|------------|------------|------------|
| O                                | 49.7844616 | 51.4938263 | 39.0794130 | C | 50.0166247 | 55.7712854 | 39.8776825 |
| H                                | 49.2421090 | 50.2167876 | 40.0684550 | H | 51.0186575 | 56.0969993 | 40.1559933 |
| H                                | 49.0574258 | 51.5115146 | 38.4165501 | N | 49.6830464 | 54.5931319 | 39.3890789 |
| H                                | 45.9916950 | 56.9997040 | 40.2541697 | H | 50.0451946 | 52.6312795 | 38.9604657 |
| H                                | 45.8802922 | 46.0861007 | 33.0455053 | C | 48.3167195 | 54.6245802 | 39.2743779 |
| H                                | 49.6058370 | 49.5086977 | 45.2589440 | H | 47.7573691 | 53.7796672 | 38.8708694 |
| H                                | 46.8525978 | 44.3266713 | 42.2957071 | C | 45.8425058 | 46.9903321 | 32.4151722 |
| H                                | 44.7486135 | 46.0630903 | 42.8465467 | H | 46.4974581 | 46.7900903 | 31.5513078 |
| H                                | 45.9765196 | 53.3832550 | 42.9092684 | H | 44.8156179 | 47.0865861 | 32.0392556 |
| H                                | 44.2466647 | 51.3229030 | 42.6224169 | N | 46.2988151 | 48.1762511 | 33.1092981 |
| H                                | 51.3156901 | 53.8178275 | 42.7011625 | H | 47.2852813 | 48.0863836 | 33.5111405 |
| H                                | 53.3220419 | 52.1022187 | 42.2833375 | C | 45.5108286 | 49.0913696 | 33.6884782 |
| H                                | 53.7260900 | 46.9913382 | 41.2896279 | N | 44.2090203 | 49.2348611 | 33.3285767 |
| H                                | 52.0773372 | 44.9385447 | 40.9068601 | H | 43.9376902 | 49.0007204 | 32.3801787 |
| H                                | 49.9519802 | 47.3452327 | 36.7083759 | H | 43.7301006 | 50.0300361 | 33.7490711 |
| H                                | 50.8235267 | 47.1006841 | 35.2087098 | N | 46.0059061 | 49.8511566 | 34.6552611 |
| H                                | 51.6284243 | 49.4991183 | 35.3425978 | H | 46.9782648 | 49.6897151 | 35.0293667 |
| H                                | 50.7141570 | 49.7160257 | 36.8081068 | H | 45.4650369 | 50.6485937 | 34.9804507 |
| H                                | 52.1391031 | 48.1507932 | 38.0325549 | S | 48.9659139 | 48.4839375 | 44.5618061 |
| H                                | 53.0182561 | 47.7162337 | 36.5963592 | N | 47.6276288 | 47.4920456 | 42.3470663 |
| H                                | 54.3658568 | 49.2958793 | 37.9537701 | C | 47.9586663 | 46.1662376 | 42.2676192 |
| H                                | 53.9603863 | 50.0298372 | 36.4241780 | C | 46.2713103 | 47.5405628 | 42.5817341 |
| H                                | 53.1198287 | 50.5361318 | 37.8835107 | C | 46.7800532 | 45.3464205 | 42.4733197 |
|                                  |            |            |            | C | 45.7155335 | 46.1955053 | 42.6832949 |
|                                  |            |            |            | C | 45.5483683 | 48.7280224 | 42.6852273 |
| <b>TS<sub>Hp-Od-recomb</sub></b> |            |            |            | H | 44.4679438 | 48.6673210 | 42.8014105 |
| C                                | 46.3856538 | 56.2845119 | 39.6106139 | C | 46.0647730 | 50.0193308 | 42.6690344 |
| H                                | 45.8095263 | 55.3517533 | 39.6819968 | N | 47.3988696 | 50.3400700 | 42.6290317 |
| H                                | 46.1576101 | 56.6887261 | 38.6034728 | C | 47.4770558 | 51.7067828 | 42.7404025 |
| C                                | 47.8156027 | 55.8452610 | 39.6891816 | C | 46.1461166 | 52.2726373 | 42.8296766 |
| N                                | 48.9271112 | 56.5674182 | 40.0634967 | C | 45.2627970 | 51.2228278 | 42.7920943 |
| H                                | 48.9617443 | 57.4733306 | 40.5427443 |   |            |            |            |

|    |            |            |            |              |            |            |            |
|----|------------|------------|------------|--------------|------------|------------|------------|
| C  | 48.6657452 | 52.4294835 | 42.7830125 | H            | 49.4041561 | 49.3667028 | 39.9033457 |
| H  | 48.5980726 | 53.4956437 | 42.9749175 | H            | 49.0571130 | 51.6819782 | 38.2494012 |
| C  | 49.9375177 | 51.9063914 | 42.5952778 | H            | 45.9443142 | 56.9605409 | 40.3429194 |
| C  | 51.1528983 | 52.6922400 | 42.5677275 | H            | 45.8889543 | 46.1036349 | 33.0473729 |
| C  | 51.5941853 | 50.5079428 | 42.2582548 | H            | 49.5755248 | 49.4878029 | 45.2863585 |
| N  | 50.2275710 | 50.5754182 | 42.3909734 | H            | 46.7656954 | 44.2732196 | 42.2833172 |
| C  | 52.1878113 | 51.8227623 | 42.3723732 | H            | 44.6693152 | 45.9945790 | 42.9137793 |
| C  | 52.3204458 | 49.3555553 | 42.0108628 | H            | 45.9057764 | 53.3291134 | 42.9486810 |
| H  | 53.4014974 | 49.4680247 | 41.9471336 | H            | 44.1746520 | 51.2641964 | 42.7441745 |
| C  | 51.7909892 | 48.0839331 | 41.8184710 | H            | 51.2396948 | 53.7754411 | 42.6526335 |
| C  | 52.5603117 | 46.9193430 | 41.4504277 | H            | 53.2445305 | 52.0568870 | 42.2435424 |
| N  | 50.4628928 | 47.7619189 | 41.9089872 | H            | 53.6421406 | 46.9350301 | 41.3182638 |
| C  | 50.3797251 | 46.3911904 | 41.7046340 | H            | 51.9951236 | 44.8827281 | 40.9525158 |
| C  | 49.2294399 | 45.6643466 | 41.9844038 | H            | 50.0063520 | 47.3881678 | 36.7840176 |
| H  | 49.3379180 | 44.5890787 | 42.0498816 | H            | 50.8219556 | 47.0692928 | 35.2654543 |
| C  | 51.6856244 | 45.8585076 | 41.3268575 | H            | 51.6643884 | 49.4585233 | 35.2740921 |
| Fe | 48.9225601 | 49.0528883 | 42.2723910 | H            | 50.8006854 | 49.7550574 | 36.7535912 |
| O  | 48.5858374 | 49.3504942 | 40.5251862 | H            | 52.2463353 | 48.1782010 | 37.9856123 |
| H  | 50.2488372 | 47.7241071 | 39.7122847 | H            | 53.0808952 | 47.7224546 | 36.5371709 |
| O  | 50.0048429 | 48.3819033 | 39.0357295 | H            | 54.4510247 | 49.3209428 | 37.8689576 |
| O  | 48.4943606 | 49.3611897 | 35.5879004 | H            | 54.0552299 | 50.0140708 | 36.3168469 |
| C  | 49.0753348 | 48.3401920 | 35.1280968 | H            | 53.2127004 | 50.5698530 | 37.7551905 |
| O  | 48.6884593 | 47.7012593 | 34.1142184 | <b>Cpd I</b> |            |            |            |
| C  | 50.3451871 | 47.8507976 | 35.8570701 | C            | 46.3622170 | 56.2791303 | 39.6385530 |
| C  | 51.3370055 | 48.9847191 | 36.1995094 | H            | 45.8359031 | 55.3261072 | 39.7982356 |
| C  | 52.5847105 | 48.5623978 | 37.0233430 | H            | 46.0468125 | 56.6162791 | 38.6314319 |
| C  | 53.6228637 | 49.6881388 | 37.2628358 | C            | 47.8197408 | 55.9227385 | 39.6335533 |
| O  | 47.4163504 | 51.3704336 | 37.1997863 | N            | 48.8934353 | 56.6294244 | 40.1254131 |
| H  | 47.9472549 | 50.6609922 | 36.7854070 | H            | 48.8865401 | 57.5078414 | 40.6540572 |
| H  | 46.9732724 | 50.8944542 | 37.9578776 | C            | 50.0195294 | 55.9110932 | 39.8587252 |
| O  | 49.9606751 | 51.7225727 | 38.6138875 | H            | 51.0037316 | 56.2457083 | 40.1859453 |

|   |            |            |            |    |            |            |            |
|---|------------|------------|------------|----|------------|------------|------------|
| N | 49.7420371 | 54.7933717 | 39.2170690 | C  | 49.8858763 | 51.8833867 | 42.6203649 |
| H | 50.1208109 | 52.9168251 | 38.5332697 | C  | 51.0984601 | 52.6782724 | 42.5715844 |
| C | 48.3780927 | 54.7869224 | 39.0747566 | C  | 51.5268362 | 50.4925427 | 42.2803125 |
| H | 47.8608253 | 53.9726423 | 38.5654604 | N  | 50.1657353 | 50.5560096 | 42.4296308 |
| C | 45.8481797 | 46.9925596 | 32.4085433 | C  | 52.1300670 | 51.8087952 | 42.3686251 |
| H | 46.5031037 | 46.7925249 | 31.5446815 | C  | 52.2419926 | 49.3257426 | 42.0506188 |
| H | 44.8193608 | 47.0747449 | 32.0343631 | H  | 53.3222479 | 49.4402882 | 41.9598919 |
| N | 46.2940365 | 48.1885535 | 33.0905354 | C  | 51.7230855 | 48.0375302 | 41.8984593 |
| H | 47.2990110 | 48.1312212 | 33.4580546 | C  | 52.5019007 | 46.8740548 | 41.5367450 |
| C | 45.5016814 | 49.0948608 | 33.6757067 | N  | 50.4086324 | 47.7143925 | 42.0315421 |
| N | 44.1949222 | 49.2251049 | 33.3246511 | C  | 50.3264512 | 46.3570982 | 41.8190809 |
| H | 43.9267925 | 49.0025220 | 32.3722198 | C  | 49.1633186 | 45.6414765 | 42.1038778 |
| H | 43.7125020 | 50.0153399 | 33.7503868 | H  | 49.2684729 | 44.5660756 | 42.1835492 |
| N | 45.9960940 | 49.8555851 | 34.6415936 | C  | 51.6291148 | 45.8120900 | 41.4317755 |
| H | 46.9732045 | 49.6966893 | 35.0080529 | Fe | 48.8440298 | 49.0250257 | 42.2549947 |
| H | 45.4601707 | 50.6574807 | 34.9639046 | O  | 48.6221488 | 49.1841596 | 40.6319558 |
| S | 48.8847457 | 48.4518651 | 44.6799142 | H  | 50.4854765 | 47.0532103 | 39.5040334 |
| N | 47.5510441 | 47.4614265 | 42.3952460 | O  | 50.3510362 | 47.8412573 | 38.9625377 |
| C | 47.8765666 | 46.1396670 | 42.3472648 | O  | 48.4980200 | 49.3986519 | 35.5421417 |
| C | 46.1949094 | 47.5079888 | 42.6062415 | C  | 49.1230202 | 48.4368872 | 35.0160752 |
| C | 46.6969502 | 45.3137658 | 42.5460797 | O  | 48.7388363 | 47.8220699 | 33.9838388 |
| C | 45.6293691 | 46.1644730 | 42.7191458 | C  | 50.4354545 | 47.9837197 | 35.6851348 |
| C | 45.4843408 | 48.7070568 | 42.6957720 | C  | 51.4147105 | 49.1354596 | 36.0121810 |
| H | 44.4019254 | 48.6504075 | 42.8014939 | C  | 52.6800274 | 48.7157345 | 36.8128539 |
| C | 46.0004447 | 50.0056589 | 42.6928992 | C  | 53.7165144 | 49.8399562 | 37.0599550 |
| N | 47.3340153 | 50.3135040 | 42.6636686 | O  | 47.3396346 | 51.4261232 | 37.1186367 |
| C | 47.4089033 | 51.6785579 | 42.7792441 | H  | 47.9176791 | 50.7647948 | 36.6886197 |
| C | 46.0810572 | 52.2535533 | 42.8648521 | H  | 46.9762291 | 50.9176329 | 37.8962258 |
| C | 45.1951344 | 51.2068001 | 42.8187919 | O  | 50.0414648 | 52.0982259 | 38.0101560 |
| C | 48.6049381 | 52.3974868 | 42.8077820 | H  | 49.7538703 | 48.4038930 | 39.5061370 |
| H | 48.5381865 | 53.4653445 | 42.9985103 | H  | 49.0861485 | 51.9221353 | 37.9515251 |



|                                            |            |            |            |   |            |            |            |
|--------------------------------------------|------------|------------|------------|---|------------|------------|------------|
| H                                          | 45.9234106 | 56.9671619 | 40.3611377 | N | 46.3766083 | 49.5656880 | 35.0588599 |
| H                                          | 45.9070232 | 46.1112302 | 33.0471848 | H | 47.3225932 | 49.2566359 | 35.3339420 |
| H                                          | 49.5162798 | 49.4422070 | 45.4043001 | H | 46.0288828 | 50.3592150 | 35.6508612 |
| H                                          | 46.6900642 | 44.2368899 | 42.3776814 | S | 49.0679324 | 48.5001325 | 44.4186771 |
| H                                          | 44.5784895 | 45.9695737 | 42.9330001 | N | 47.5780284 | 47.6761286 | 42.1320218 |
| H                                          | 45.8469314 | 53.3117244 | 42.9811545 | C | 47.9165395 | 46.3545996 | 42.0678956 |
| H                                          | 44.1072222 | 51.2498484 | 42.7672059 | C | 46.2367726 | 47.7120988 | 42.4184586 |
| H                                          | 51.1817518 | 53.7620937 | 42.6519650 | C | 46.7522228 | 45.5189186 | 42.3305339 |
| H                                          | 53.1855876 | 52.0365172 | 42.2200109 | C | 45.6877472 | 46.3596894 | 42.5533087 |
| H                                          | 53.5806342 | 46.8992808 | 41.3825865 | C | 45.5204778 | 48.8993553 | 42.5770893 |
| H                                          | 51.9309402 | 44.8340496 | 41.0570684 | H | 44.4403886 | 48.8356893 | 42.7007506 |
| H                                          | 50.1529180 | 47.5000311 | 36.6201672 | C | 46.0415527 | 50.1911053 | 42.6366410 |
| H                                          | 50.9129882 | 47.2273039 | 35.0623476 | N | 47.3736185 | 50.5050703 | 42.6484914 |
| H                                          | 51.7182794 | 49.6198280 | 35.0841183 | C | 47.4580614 | 51.8569349 | 42.8444357 |
| H                                          | 50.8788058 | 49.8983909 | 36.5768128 | C | 46.1267102 | 52.4302973 | 42.9055885 |
| H                                          | 52.3440154 | 48.3168408 | 37.7699573 | C | 45.2389058 | 51.3907881 | 42.7906322 |
| H                                          | 53.1747526 | 47.8871658 | 36.3061114 | C | 48.6629004 | 52.5554553 | 42.9715940 |
| H                                          | 54.5413116 | 49.4686312 | 37.6681445 | H | 48.6016679 | 53.5981017 | 43.2685118 |
| H                                          | 54.1546602 | 50.1767584 | 36.1204553 | C | 49.9363991 | 52.0478797 | 42.7062998 |
| H                                          | 53.3046941 | 50.7209568 | 37.5522039 | C | 51.1580372 | 52.8348451 | 42.6497904 |
| <b>Cpd 0 to Cpd I formation via Arg245</b> |            |            |            | C | 51.5541390 | 50.6792160 | 42.1523033 |
| <b>Cpd 0</b>                               |            |            |            | N | 50.2050281 | 50.7489251 | 42.3699236 |
| C                                          | 45.9906799 | 47.0102599 | 32.5126266 | C | 52.1751827 | 51.9786098 | 42.3327871 |
| H                                          | 46.6315344 | 46.8175798 | 31.6367491 | C | 52.2566806 | 49.5400854 | 41.7732104 |
| H                                          | 44.9835498 | 47.2439339 | 32.1448123 | H | 53.3364123 | 49.6529677 | 41.6845622 |
| N                                          | 46.5566872 | 48.0874120 | 33.3070000 | C | 51.7252005 | 48.2795057 | 41.5177918 |
| H                                          | 47.4396785 | 47.8244303 | 33.7861946 | C | 52.5060863 | 47.1094357 | 41.1702092 |
| C                                          | 45.8361085 | 49.0064072 | 33.9972362 | N | 50.3927252 | 47.9624254 | 41.5910753 |
| N                                          | 44.5778368 | 49.3122294 | 33.6097558 | C | 50.3234606 | 46.5913699 | 41.4226197 |
| H                                          | 44.3360550 | 49.1781729 | 32.6349416 | C | 49.1871014 | 45.8604147 | 41.7588558 |
| H                                          | 44.1614163 | 50.1353375 | 34.0532375 | H | 49.3142123 | 44.7891189 | 41.8657902 |

|            |            |            |            |   |            |            |            |
|------------|------------|------------|------------|---|------------|------------|------------|
| C          | 51.6356202 | 46.0457664 | 41.0682774 | N | 44.5965038 | 49.3169201 | 33.6539296 |
| Fe         | 48.8697818 | 49.2450611 | 42.2037658 | H | 44.5226163 | 49.4080005 | 32.6440848 |
| O          | 48.4510477 | 49.9168687 | 40.3999776 | H | 44.2017146 | 50.1307719 | 34.1321516 |
| H          | 49.7218255 | 48.6690036 | 39.7262540 | N | 46.3222702 | 49.5470531 | 35.2053658 |
| O          | 48.9713314 | 49.1230097 | 39.2946070 | H | 47.2653336 | 49.1779859 | 35.4135096 |
| O          | 45.9477027 | 50.2606010 | 39.3998138 | H | 46.2199195 | 50.6138207 | 36.4016582 |
| H          | 45.3795684 | 49.4631589 | 39.3803513 | S | 49.0397707 | 48.5133302 | 44.4055339 |
| H          | 46.7996149 | 49.9830054 | 39.8325950 | N | 47.5447149 | 47.6710364 | 42.1453279 |
| O          | 46.2827866 | 51.4311088 | 36.9996220 | C | 47.8802496 | 46.3484991 | 42.0784063 |
| H          | 47.2746965 | 51.4023550 | 37.0555201 | C | 46.2023345 | 47.7065809 | 42.4349621 |
| H          | 46.0603950 | 50.9744813 | 37.8568271 | C | 46.7156588 | 45.5134519 | 42.3385104 |
| O          | 48.9652783 | 51.0351894 | 37.3013964 | C | 45.6533059 | 46.3540946 | 42.5683708 |
| H          | 49.0412487 | 50.4592880 | 38.0994954 | C | 45.4871257 | 48.8938108 | 42.5892719 |
| H          | 49.0101945 | 50.3118958 | 36.5899775 | H | 44.4081719 | 48.8312583 | 42.7224031 |
| H          | 45.9413833 | 46.0783011 | 33.0757339 | C | 46.0095523 | 50.1866794 | 42.6359667 |
| H          | 49.6313248 | 49.4795213 | 45.2109739 | N | 47.3439407 | 50.5017026 | 42.6345832 |
| H          | 46.7457424 | 44.4389370 | 42.1833439 | C | 47.4278623 | 51.8575666 | 42.8232319 |
| H          | 44.6503908 | 46.1577569 | 42.8201082 | C | 46.0983865 | 52.4280344 | 42.8885780 |
| H          | 45.8942160 | 53.4857517 | 43.0471143 | C | 45.2093927 | 51.3861475 | 42.7866363 |
| H          | 44.1532494 | 51.4341978 | 42.7038394 | C | 48.6313475 | 52.5596895 | 42.9419907 |
| H          | 51.2405726 | 53.9178296 | 42.7414408 | H | 48.5705291 | 53.6023678 | 43.2398047 |
| H          | 53.2283851 | 52.2140394 | 42.1798013 | C | 49.9027590 | 52.0515948 | 42.6763715 |
| H          | 53.5930123 | 47.1073291 | 41.0886332 | C | 51.1269063 | 52.8345220 | 42.6316823 |
| H          | 51.9503420 | 45.0577800 | 40.7322712 | C | 51.5186662 | 50.6788407 | 42.1313222 |
| <b>TS1</b> |            |            |            | N | 50.1672363 | 50.7497745 | 42.3380492 |
| C          | 46.0501494 | 47.0983563 | 32.5355424 | C | 52.1427027 | 51.9756560 | 42.3183412 |
| H          | 46.6804492 | 46.9029333 | 31.6491484 | C | 52.2208909 | 49.5367569 | 41.7625873 |
| H          | 45.0422631 | 47.3451316 | 32.1781977 | H | 53.3008448 | 49.6472904 | 41.6767016 |
| N          | 46.6242017 | 48.1730972 | 33.3246958 | C | 51.6874726 | 48.2765644 | 41.5165023 |
| H          | 47.4938429 | 47.8893660 | 33.8091945 | C | 52.4666653 | 47.1050088 | 41.1780645 |
| C          | 45.8721585 | 49.0358029 | 34.1053236 | N | 50.3507401 | 47.9606208 | 41.5890878 |

|           |            |            |            |   |            |            |            |
|-----------|------------|------------|------------|---|------------|------------|------------|
| C         | 50.2851261 | 46.5841301 | 41.4325610 | N | 46.6015202 | 48.2075197 | 33.2527888 |
| C         | 49.1506060 | 45.8535923 | 41.7712342 | H | 47.4978869 | 47.9888851 | 33.7207491 |
| H         | 49.2772774 | 44.7827488 | 41.8805362 | C | 45.8292839 | 49.0730492 | 34.0158020 |
| C         | 51.5966008 | 46.0400856 | 41.0817821 | N | 44.5406797 | 49.2990125 | 33.5549299 |
| Fe        | 48.8406326 | 49.2321393 | 42.2340932 | H | 44.4799835 | 49.4020692 | 32.5443123 |
| O         | 48.3583463 | 49.8927241 | 40.3302117 | H | 44.1272880 | 50.1015876 | 34.0367688 |
| H         | 49.6926360 | 48.6565448 | 39.7750023 | N | 46.2563804 | 49.6397465 | 35.0928603 |
| O         | 49.0226782 | 49.1577797 | 39.2637274 | H | 47.1951981 | 49.2937962 | 35.3509634 |
| O         | 46.1149520 | 50.0985243 | 39.3650842 | H | 46.1448902 | 50.8162479 | 36.3357955 |
| H         | 45.4861278 | 49.3411850 | 39.3337708 | S | 49.0595668 | 48.4391380 | 44.5632843 |
| H         | 47.0684567 | 49.8708433 | 39.8530487 | N | 47.6386529 | 47.5230821 | 42.2978189 |
| O         | 46.4398716 | 51.1967761 | 37.2295861 | C | 47.9682181 | 46.1994271 | 42.2049792 |
| H         | 47.4466121 | 51.2425530 | 37.2174810 | C | 46.2901775 | 47.5588921 | 42.5646443 |
| H         | 46.2346063 | 50.5688374 | 38.3168212 | C | 46.7952132 | 45.3657526 | 42.4286449 |
| O         | 49.0614092 | 51.0366865 | 37.3075618 | C | 45.7331226 | 46.2068911 | 42.6596359 |
| H         | 49.1995828 | 50.4695066 | 38.1020667 | C | 45.5735162 | 48.7462988 | 42.7077733 |
| H         | 49.0575989 | 50.2836524 | 36.5990244 | H | 44.4946670 | 48.6847604 | 42.8398732 |
| H         | 45.9910494 | 46.1523172 | 33.0736729 | C | 46.0906723 | 50.0407918 | 42.7176777 |
| H         | 49.6099150 | 49.4985519 | 45.1856755 | N | 47.4258988 | 50.3607686 | 42.6913034 |
| H         | 46.7083215 | 44.4348084 | 42.1818530 | C | 47.4994172 | 51.7244944 | 42.8427255 |
| H         | 44.6171918 | 46.1517074 | 42.8396163 | C | 46.1690057 | 52.2889041 | 42.9106755 |
| H         | 45.8660113 | 53.4834107 | 43.0308795 | C | 45.2854688 | 51.2399124 | 42.8446331 |
| H         | 44.1229288 | 51.4299271 | 42.7108290 | C | 48.6941583 | 52.4406640 | 42.9360973 |
| H         | 51.2141465 | 53.9163016 | 42.7327224 | H | 48.6263207 | 53.4894774 | 43.2137690 |
| H         | 53.1977501 | 52.2075698 | 42.1728822 | C | 49.9695953 | 51.9319924 | 42.7009322 |
| H         | 53.5535412 | 47.1010725 | 41.0958908 | C | 51.1827117 | 52.7271738 | 42.6291047 |
| H         | 51.9130558 | 45.0510866 | 40.7504148 | C | 51.6020760 | 50.5532306 | 42.2382316 |
| <b>RC</b> |            |            |            | N | 50.2475104 | 50.6160931 | 42.4325752 |
| C         | 46.0554151 | 47.0842132 | 32.5164080 | C | 52.2092315 | 51.8662019 | 42.3646064 |
| H         | 46.6816106 | 46.8712872 | 31.6306321 | C | 52.3131866 | 49.4043891 | 41.9119410 |
| H         | 45.0372347 | 47.2881834 | 32.1605924 | H | 53.3922339 | 49.5200366 | 41.8197745 |

|                         |            |            |            |   |            |            |            |
|-------------------------|------------|------------|------------|---|------------|------------|------------|
| C                       | 51.7835805 | 48.1381847 | 41.6860354 | C | 46.1072152 | 47.1141586 | 32.4846151 |
| C                       | 52.5553410 | 46.9751398 | 41.3152421 | H | 46.7376627 | 46.8777209 | 31.6084054 |
| N                       | 50.4446241 | 47.8163037 | 41.7685071 | H | 45.0868340 | 47.2895653 | 32.1192059 |
| C                       | 50.3782828 | 46.4399832 | 41.5825735 | N | 46.6420041 | 48.2759903 | 33.1665156 |
| C                       | 49.2377326 | 45.7068129 | 41.8935367 | H | 47.5899877 | 48.1202576 | 33.5499233 |
| H                       | 49.3560576 | 44.6327495 | 41.9652312 | C | 45.8758633 | 49.1066967 | 33.9756409 |
| C                       | 51.6846330 | 45.9098070 | 41.2047895 | N | 44.5552002 | 49.2754799 | 33.5745332 |
| Fe                      | 48.9373172 | 49.0754675 | 42.4106817 | H | 44.4534276 | 49.3807408 | 32.5671217 |
| O                       | 48.5429804 | 49.6482342 | 40.3749390 | H | 44.1362721 | 50.0664109 | 34.0708646 |
| H                       | 49.8792045 | 48.3892305 | 39.9847969 | N | 46.3241993 | 49.6934714 | 35.0306891 |
| O                       | 49.2914033 | 48.9061202 | 39.3879957 | H | 47.2918542 | 49.3985565 | 35.2439043 |
| O                       | 46.2085237 | 49.9132452 | 39.3951711 | H | 46.1185363 | 50.8469787 | 36.3541166 |
| H                       | 45.5017364 | 49.2350098 | 39.3034324 | S | 48.9415459 | 48.4541700 | 44.6528127 |
| H                       | 47.5789759 | 49.6070103 | 40.0075130 | N | 47.6230474 | 47.5952974 | 42.2720732 |
| O                       | 46.3687453 | 51.3901979 | 37.1355266 | C | 47.9626220 | 46.2772549 | 42.2039525 |
| H                       | 47.3412755 | 51.2875600 | 37.2047370 | C | 46.2691346 | 47.6127929 | 42.5118319 |
| H                       | 46.1920427 | 50.4129135 | 38.5336555 | C | 46.7978194 | 45.4281110 | 42.4158795 |
| O                       | 49.1187527 | 51.0290827 | 37.6196926 | C | 45.7219976 | 46.2595747 | 42.6146815 |
| H                       | 49.3883584 | 50.4244145 | 38.3400400 | C | 45.5488996 | 48.7998158 | 42.6411374 |
| H                       | 49.0110590 | 50.3186769 | 36.8756722 | H | 44.4638032 | 48.7387003 | 42.7180741 |
| H                       | 46.0254938 | 46.1575510 | 33.0895303 | C | 46.0735255 | 50.0946490 | 42.7110932 |
| H                       | 49.6218189 | 49.4519110 | 45.3132914 | N | 47.4053834 | 50.3796994 | 42.7798840 |
| H                       | 46.7836920 | 44.2912852 | 42.2457402 | C | 47.4968145 | 51.7393327 | 42.9455173 |
| H                       | 44.6898195 | 46.0045259 | 42.9017808 | C | 46.1726569 | 52.3308391 | 42.9543736 |
| H                       | 45.9341708 | 53.3478145 | 43.0185104 | C | 45.2774113 | 51.3017198 | 42.8157232 |
| H                       | 44.1988872 | 51.2814319 | 42.7692432 | C | 48.7017721 | 52.4335693 | 43.0662561 |
| H                       | 51.2580160 | 53.8115659 | 42.7096666 | H | 48.6298825 | 53.4846856 | 43.3332669 |
| H                       | 53.2626671 | 52.1039726 | 42.2169395 | C | 49.9927120 | 51.9464002 | 42.8336464 |
| H                       | 53.6389427 | 46.9807889 | 41.1975867 | C | 51.1919319 | 52.7620042 | 42.7487761 |
| H                       | 51.9998486 | 44.9316329 | 40.8416342 | C | 51.6386821 | 50.5989938 | 42.3721819 |
| <b>TS<sub>o-o</sub></b> |            |            |            | N | 50.2889221 | 50.6381582 | 42.5762768 |

C 52.2320574 51.9161600 42.4849872  
 C 52.3501497 49.4501645 42.0318713  
 H 53.4280926 49.5708669 41.9231987  
 C 51.8233052 48.1829347 41.7941817  
 C 52.5896493 47.0275508 41.3781577  
 N 50.4948097 47.8707456 41.9060301  
 C 50.4090249 46.5270005 41.6482739  
 C 49.2514521 45.7978352 41.9401812  
 H 49.3750560 44.7238566 42.0254478  
 C 51.7071715 45.9782965 41.2497899  
 Fe 48.9415521 49.1460000 42.3533775  
 O 48.6955365 49.8189852 40.6321587  
 H 50.3847083 48.7655966 39.6277816  
 O 49.7851466 48.4660557 38.9194448  
 O 46.0975999 50.0185573 39.5165908  
 H 45.4575443 49.2891678 39.3714029  
 H 47.7903504 49.6335820 40.2902485  
 O 46.3216862 51.4102736 37.1568813  
 H 47.2866040 51.2424696 37.2799426  
 H 46.1006225 50.4759374 38.6385701  
 O 48.9645732 50.8479525 37.6157144  
 H 49.1810808 50.1622806 38.2873447  
 H 48.9824027 50.2524161 36.7824417  
 H 46.0874270 46.2037164 33.0835897  
 H 49.5552371 49.4082330 45.4386206  
 H 46.8042235 44.3513916 42.2464646  
 H 44.6776146 46.0506245 42.8463517  
 H 45.9453189 53.3907272 43.0684861  
 H 44.1979130 51.3581641 42.6758497  
 H 51.2528944 53.8485373 42.8103911  
 H 53.2819188 52.1624005 42.3261671

H 53.6719870 47.0332211 41.2493939  
 H 52.0028036 45.0020213 40.8656604

**Cpd 0 to Cpd I formation via Substrate**  
**Cpd 0**

C 46.7140131 56.6600159 39.0800110  
 H 45.9900129 56.4980159 38.2820108  
 H 47.5220134 57.2540161 38.6530109  
 C 47.2500133 55.3190155 39.4120111  
 N 48.5080136 55.0250155 39.9640112  
 H 49.1240138 55.7280157 40.3490113  
 C 48.7440137 53.6970151 39.8510112  
 H 49.6000139 53.1440149 40.2080113  
 N 47.5870134 53.1250149 39.4660111  
 H 47.5160134 52.1980147 39.0710110  
 C 46.6740131 54.0850152 39.1290110  
 H 45.7050128 53.9530152 38.6700109  
 C 45.7140128 46.7560131 32.4650091  
 H 46.2220130 46.4200130 31.5610089  
 H 44.6750126 46.9740132 32.2170091  
 N 46.3050130 48.0200135 33.0270093  
 H 47.0720132 47.8200134 33.6530095  
 C 45.6100128 49.0880138 33.4550094  
 N 44.4840125 49.3930139 33.0340093  
 H 43.8530123 48.8120137 32.5000091  
 H 44.2000124 50.3370141 33.2550093  
 N 46.2200130 49.7900140 34.3770097  
 H 47.0140132 49.4160139 34.8760098  
 H 45.9570129 50.6560142 34.8260098  
 S 49.0110138 48.7400137 44.5910125  
 N 47.8710135 47.6730134 42.2610119  
 C 48.1310135 46.4450131 42.1940119

|    |            |            |            |   |            |            |            |
|----|------------|------------|------------|---|------------|------------|------------|
| C  | 46.5770131 | 47.7690134 | 42.4530119 | C | 48.9320138 | 48.5480136 | 35.5950100 |
| C  | 47.0410132 | 45.6850128 | 42.3460119 | O | 48.1480135 | 47.8310134 | 35.0160098 |
| C  | 46.0870130 | 46.5280131 | 42.5570120 | C | 50.2430141 | 48.0010135 | 36.1710102 |
| C  | 45.9420129 | 48.9140137 | 42.6320120 | C | 51.2880144 | 49.1460138 | 36.4560102 |
| H  | 44.8860126 | 48.9500138 | 42.8900121 | C | 52.6750148 | 48.7440137 | 37.1360104 |
| C  | 46.5590131 | 50.1450141 | 42.6460120 | C | 53.5250150 | 49.9850140 | 37.3080105 |
| N  | 47.7930134 | 50.3980142 | 42.5510120 | H | 49.2300138 | 49.7000140 | 36.5760103 |
| C  | 47.8710135 | 51.7010145 | 42.6840120 | O | 46.5070131 | 51.2260144 | 36.8420104 |
| C  | 46.6830131 | 52.2990147 | 42.8470120 | H | 47.1860133 | 50.7330143 | 36.3800102 |
| C  | 45.8540129 | 51.2640144 | 42.8070120 | H | 46.5390131 | 50.8940143 | 37.7400106 |
| C  | 49.0270138 | 52.4510147 | 42.7680120 | O | 49.0870138 | 51.0980144 | 38.1710107 |
| H  | 48.9590138 | 53.4970150 | 43.0610121 | H | 49.2750138 | 50.3110141 | 38.6830109 |
| C  | 50.2020141 | 51.8990146 | 42.6250120 | H | 49.0450138 | 50.7900143 | 37.2660105 |
| C  | 51.3130144 | 52.5740148 | 42.5040119 | H | 46.1814744 | 57.1793454 | 39.8767334 |
| C  | 51.7320145 | 50.5280142 | 42.2950119 | H | 45.7601145 | 45.9212178 | 33.1643364 |
| N  | 50.4560142 | 50.6330142 | 42.5170119 | H | 49.5132404 | 49.7504459 | 45.3854573 |
| C  | 52.2970147 | 51.6930145 | 42.3260119 | H | 46.9599904 | 44.5983121 | 42.3218472 |
| C  | 52.4530147 | 49.3710139 | 42.0090118 | H | 45.0297446 | 46.3707865 | 42.7703909 |
| H  | 53.5320150 | 49.5000139 | 42.0480118 | H | 46.4178432 | 53.3497949 | 42.9636868 |
| C  | 51.9100146 | 48.1250135 | 41.9230118 | H | 44.7698608 | 51.3766179 | 42.8083852 |
| C  | 52.6400148 | 47.0720132 | 41.7090117 | H | 51.3785828 | 53.6615941 | 42.5346580 |
| N  | 50.6320142 | 47.8860135 | 42.0080118 | H | 53.3427981 | 51.9790776 | 42.2138867 |
| C  | 50.4930142 | 46.6450131 | 41.8050117 | H | 53.7108065 | 47.0670129 | 41.5054256 |
| C  | 49.3510139 | 45.9060129 | 41.9970118 | H | 52.1167367 | 45.0651576 | 41.3798510 |
| H  | 49.4810139 | 44.8280126 | 41.9370118 | H | 50.0352467 | 47.4619414 | 37.0952943 |
| C  | 51.7370145 | 46.0650129 | 41.5900117 | H | 50.6734466 | 47.2828768 | 35.4731027 |
| Fe | 49.2220138 | 49.1180138 | 42.3400119 | H | 51.5104120 | 49.6379843 | 35.5091356 |
| O  | 48.9200137 | 49.2900139 | 40.5250114 | H | 50.8059607 | 49.8865112 | 37.0942539 |
| H  | 49.9400140 | 47.6810134 | 40.1040113 | H | 52.4963876 | 48.2744152 | 38.1032936 |
| O  | 49.8050140 | 48.4780136 | 39.5610111 | H | 53.1977484 | 48.0133108 | 36.5188475 |
| O  | 48.4420136 | 49.6030139 | 35.9980101 | H | 54.4570017 | 49.6848446 | 37.7869325 |

|           |            |            |            |    |            |            |            |
|-----------|------------|------------|------------|----|------------|------------|------------|
| H         | 53.7811381 | 50.3512251 | 36.3138487 | C  | 46.9738401 | 45.1674066 | 42.5036421 |
| H         | 53.1156790 | 50.8213910 | 37.8745656 | C  | 45.8994426 | 45.9987470 | 42.7121168 |
| <b>RC</b> |            |            |            | C  | 45.7196437 | 48.5355662 | 42.7803318 |
| C         | 46.5655993 | 56.6717437 | 39.4591998 | H  | 44.6394002 | 48.4620351 | 42.8912303 |
| H         | 45.9334254 | 56.6535454 | 38.5572086 | C  | 46.2195695 | 49.8380008 | 42.8167025 |
| H         | 47.4897580 | 57.2099573 | 39.1919114 | N  | 47.5572210 | 50.1755531 | 42.7908135 |
| C         | 46.9649284 | 55.2781325 | 39.8164151 | C  | 47.6102371 | 51.5348941 | 43.0141390 |
| N         | 48.2511071 | 54.9941387 | 40.2600258 | C  | 46.2722358 | 52.0822167 | 43.0970747 |
| H         | 48.9571607 | 55.7027386 | 40.5265245 | C  | 45.4003125 | 51.0256552 | 42.9787106 |
| C         | 48.4120549 | 53.6766501 | 40.3916764 | C  | 48.7974019 | 52.2641979 | 43.1103960 |
| H         | 49.3205981 | 53.1551999 | 40.6773557 | H  | 48.7246307 | 53.3063177 | 43.4120159 |
| N         | 47.2587607 | 53.0995732 | 40.0536089 | C  | 50.0707480 | 51.7783587 | 42.8299252 |
| H         | 47.0556402 | 52.0972693 | 40.0840604 | C  | 51.2553392 | 52.6015502 | 42.6873474 |
| C         | 46.3413248 | 54.0631541 | 39.6978592 | C  | 51.7206948 | 50.4269670 | 42.3539020 |
| H         | 45.3304128 | 53.7981628 | 39.4154049 | N  | 50.3656529 | 50.4594346 | 42.5790929 |
| C         | 45.8255882 | 46.9174038 | 32.4410845 | C  | 52.2913318 | 51.7618206 | 42.3999204 |
| H         | 46.5014253 | 46.7369280 | 31.5897698 | C  | 52.4607984 | 49.2808712 | 42.0896967 |
| H         | 44.8123416 | 47.0535011 | 32.0439682 | H  | 53.5372522 | 49.4191197 | 41.9934599 |
| N         | 46.2784245 | 48.0644094 | 33.2094139 | C  | 51.9639055 | 47.9890858 | 41.9296417 |
| H         | 47.1567030 | 47.8818579 | 33.7585087 | C  | 52.7522816 | 46.8395257 | 41.5579096 |
| C         | 45.4933918 | 49.0336995 | 33.6974561 | N  | 50.6280625 | 47.6461052 | 42.0047222 |
| N         | 44.2478149 | 49.2503299 | 33.2248018 | C  | 50.5772114 | 46.2712376 | 41.7832865 |
| H         | 43.9946152 | 48.9421496 | 32.2927873 | C  | 49.4249178 | 45.5319182 | 42.0278265 |
| H         | 43.7622951 | 50.0707813 | 33.5764757 | H  | 49.5347530 | 44.4568555 | 42.0357339 |
| N         | 45.9451116 | 49.7903548 | 34.6955979 | C  | 51.8933052 | 45.7647227 | 41.4132858 |
| H         | 46.8590567 | 49.5907769 | 35.1586786 | Fe | 49.0929552 | 48.8897174 | 42.6114983 |
| H         | 45.3959498 | 50.6080305 | 34.9540138 | O  | 48.7864314 | 49.2901050 | 40.4424928 |
| S         | 49.1183726 | 48.3459816 | 44.7677246 | H  | 50.1997158 | 48.0848378 | 40.3065610 |
| N         | 47.8125196 | 47.3328223 | 42.4483743 | O  | 49.7207167 | 48.5897667 | 39.5952328 |
| C         | 48.1492313 | 46.0119978 | 42.3327724 | O  | 48.3354029 | 49.1624696 | 35.9446540 |
| C         | 46.4533195 | 47.3552141 | 42.6582535 | C  | 48.8214934 | 48.0317585 | 35.6369599 |

|   |            |            |            |            |            |            |            |
|---|------------|------------|------------|------------|------------|------------|------------|
| O | 48.4110406 | 47.3143305 | 34.7055211 | H          | 53.1167877 | 50.2973113 | 37.9300808 |
| C | 50.0416868 | 47.5428730 | 36.4703166 | <b>TS1</b> |            |            |            |
| C | 51.1804399 | 48.5911747 | 36.5254243 | C          | 46.5685024 | 56.6059441 | 39.5005579 |
| C | 52.4129630 | 48.2484966 | 37.4094794 | H          | 45.9466255 | 56.6029773 | 38.5909298 |
| C | 53.4827221 | 49.3725728 | 37.4839664 | H          | 47.4995546 | 57.1381125 | 39.2456428 |
| H | 50.4203305 | 50.7223075 | 39.0588189 | C          | 46.9602794 | 55.2016246 | 39.8332722 |
| O | 47.6269235 | 50.9636369 | 37.7397961 | N          | 48.2665968 | 54.8948826 | 40.1969957 |
| H | 47.9043333 | 50.1895629 | 37.1910700 | H          | 48.9856288 | 55.5951258 | 40.4498243 |
| H | 47.0318912 | 50.5937811 | 38.4402213 | C          | 48.4243393 | 53.5719239 | 40.2793384 |
| O | 49.7935689 | 51.4470795 | 39.2018886 | H          | 49.3468976 | 53.0325887 | 40.4806406 |
| H | 49.0823970 | 50.2239157 | 40.2813369 | N          | 47.2482704 | 53.0132974 | 39.9936722 |
| H | 49.0475329 | 51.2851190 | 38.5556637 | H          | 47.0464970 | 52.0066200 | 39.9803239 |
| H | 46.0296357 | 57.2127267 | 40.2390380 | C          | 46.3210848 | 53.9931791 | 39.7185833 |
| H | 45.8320446 | 46.0143926 | 33.0514912 | H          | 45.2938757 | 53.7441464 | 39.4832716 |
| H | 49.6227748 | 49.3896475 | 45.5165151 | C          | 45.8094126 | 46.9202445 | 32.4249078 |
| H | 46.9745867 | 44.0957744 | 42.3044662 | H          | 46.4798530 | 46.7374581 | 31.5696709 |
| H | 44.8501816 | 45.7878385 | 42.9186022 | H          | 44.7935746 | 47.0524928 | 32.0330058 |
| H | 46.0273411 | 53.1408053 | 43.1835853 | N          | 46.2648791 | 48.0711453 | 33.1845443 |
| H | 44.3153003 | 51.0684385 | 42.8839199 | H          | 47.1413198 | 47.8870161 | 33.7385831 |
| H | 51.2976152 | 53.6896275 | 42.7360049 | C          | 45.4809460 | 49.0387429 | 33.6790224 |
| H | 53.3361889 | 52.0174177 | 42.2238214 | N          | 44.2271742 | 49.2482983 | 33.2241767 |
| H | 53.8367920 | 46.8649624 | 41.4518083 | H          | 43.9600937 | 48.9312731 | 32.2991924 |
| H | 52.2268780 | 44.7998904 | 41.0313238 | H          | 43.7465219 | 50.0712767 | 33.5766544 |
| H | 49.6958392 | 47.3378726 | 37.4834461 | N          | 45.9440355 | 49.7979078 | 34.6687290 |
| H | 50.3953469 | 46.5939371 | 36.0671883 | H          | 46.8859100 | 49.6268374 | 35.0838913 |
| H | 51.5158522 | 48.8031852 | 35.5102311 | H          | 45.4042063 | 50.6195240 | 34.9340271 |
| H | 50.7382916 | 49.5254879 | 36.8713012 | S          | 49.0584780 | 48.3417311 | 44.7911078 |
| H | 52.0766988 | 48.0057031 | 38.4174699 | N          | 47.6825304 | 47.3525769 | 42.4891988 |
| H | 52.8769461 | 47.3317048 | 37.0457768 | C          | 48.0105598 | 46.0272144 | 42.3552274 |
| H | 54.3421247 | 49.0416824 | 38.0670666 | C          | 46.3284869 | 47.3764848 | 42.7196067 |
| H | 53.8608050 | 49.6100750 | 36.4896259 | C          | 46.8315909 | 45.1894237 | 42.5216035 |



|    |            |            |            |   |            |            |            |
|----|------------|------------|------------|---|------------|------------|------------|
| C  | 45.7662949 | 46.0238970 | 42.7591839 | C | 50.0830712 | 47.6299984 | 36.3758679 |
| C  | 45.6043592 | 48.5626152 | 42.8664730 | C | 51.2138350 | 48.6842884 | 36.4471732 |
| H  | 44.5252345 | 48.4929291 | 42.9912454 | C | 52.4207621 | 48.3465816 | 37.3675016 |
| C  | 46.1063758 | 49.8622414 | 42.8855508 | C | 53.4956943 | 49.4634118 | 37.4562199 |
| N  | 47.4446802 | 50.1883409 | 42.8608513 | H | 50.0237345 | 50.3715377 | 38.9969092 |
| C  | 47.5045533 | 51.5561933 | 43.0483625 | O | 47.4784776 | 51.1562520 | 37.4206614 |
| C  | 46.1681540 | 52.1095432 | 43.1164939 | H | 47.8656222 | 50.3958682 | 36.9260586 |
| C  | 45.2927888 | 51.0561007 | 43.0229779 | H | 46.9641204 | 50.7340107 | 38.1522287 |
| C  | 48.6927721 | 52.2804883 | 43.1322825 | O | 49.7847200 | 51.3212296 | 38.9661654 |
| H  | 48.6225195 | 53.3281806 | 43.4138874 | H | 49.0117619 | 50.2447130 | 40.5341519 |
| C  | 49.9695460 | 51.7930304 | 42.8524369 | H | 48.9964545 | 51.3308159 | 38.3717569 |
| C  | 51.1544346 | 52.6098877 | 42.6968118 | H | 46.0296251 | 57.1544463 | 40.2731015 |
| C  | 51.6042919 | 50.4342272 | 42.3691676 | H | 45.8224367 | 46.0187778 | 33.0374886 |
| N  | 50.2544980 | 50.4734589 | 42.6093710 | H | 49.5666853 | 49.3835862 | 45.5398472 |
| C  | 52.1850326 | 51.7620006 | 42.4043620 | H | 46.8242501 | 44.1220958 | 42.3006414 |
| C  | 52.3298948 | 49.2789002 | 42.0971761 | H | 44.7181011 | 45.8154956 | 42.9734872 |
| H  | 53.4049846 | 49.4127115 | 41.9798315 | H | 45.9286133 | 53.1699535 | 43.1953452 |
| C  | 51.8269619 | 47.9880425 | 41.9415921 | H | 44.2073663 | 51.0981157 | 42.9326454 |
| C  | 52.6133029 | 46.8430979 | 41.5439388 | H | 51.2044965 | 53.6978384 | 42.7406772 |
| N  | 50.5013978 | 47.6422402 | 42.0534092 | H | 53.2278651 | 52.0099451 | 42.2066474 |
| C  | 50.4435607 | 46.2855142 | 41.8053104 | H | 53.6954798 | 46.8677874 | 41.4160688 |
| C  | 49.2824188 | 45.5463215 | 42.0516441 | H | 52.0773404 | 44.8080228 | 41.0170157 |
| H  | 49.3895122 | 44.4701619 | 42.0631356 | H | 49.7307518 | 47.4179598 | 37.3853122 |
| C  | 51.7514856 | 45.7715764 | 41.4087430 | H | 50.4432785 | 46.6844006 | 35.9706980 |
| Fe | 48.9639988 | 48.8952630 | 42.6191540 | H | 51.5744483 | 48.8880928 | 35.4389624 |
| O  | 48.5981593 | 49.3686484 | 40.6854393 | H | 50.7664371 | 49.6214786 | 36.7781971 |
| H  | 50.0345811 | 48.0779806 | 40.0857297 | H | 52.0477199 | 48.1268952 | 38.3678239 |
| O  | 49.5704621 | 48.6233228 | 39.4183720 | H | 52.8872819 | 47.4197205 | 37.0338028 |
| O  | 48.4127775 | 49.2670201 | 35.7950602 | H | 54.3385318 | 49.1331524 | 38.0633615 |
| C  | 48.8525863 | 48.1036265 | 35.5519910 | H | 53.9005001 | 49.6868460 | 36.4691655 |
| O  | 48.3795823 | 47.3295058 | 34.6969121 | H | 53.1212831 | 50.3938216 | 37.8830935 |

**IM**

C 46.5722514 56.5857229 39.5457465  
H 45.9678205 56.5992343 38.6239839  
H 47.5138739 57.1083214 39.3119437  
C 46.9445564 55.1714998 39.8654091  
N 48.2642085 54.8366632 40.1477849  
H 49.0030734 55.5251818 40.3717090  
C 48.4030795 53.5092120 40.2069372  
H 49.3259428 52.9372853 40.3160377  
N 47.2006942 52.9763685 39.9908504  
H 46.9888529 51.9693586 39.9649613  
C 46.2766410 53.9751701 39.7819198  
H 45.2319838 53.7484009 39.6068444  
C 45.8082208 46.9395743 32.4033447  
H 46.4698903 46.7509610 31.5427455  
H 44.7864863 47.0576788 32.0223733  
N 46.2641109 48.1056876 33.1377275  
H 47.1813555 47.9526428 33.6381233  
C 45.4782346 49.0558240 33.6590830  
N 44.2102524 49.2478492 33.2317531  
H 43.9414930 48.9544606 32.2991902  
H 43.7226197 50.0559598 33.6083632  
N 45.9487862 49.8136588 34.6459639  
H 46.8924877 49.6381908 35.0604356  
H 45.4061403 50.6308085 34.9185615  
S 49.0108962 48.3392762 44.8111640  
N 47.6042897 47.3725106 42.5239265  
C 47.9168535 46.0611914 42.3783569  
C 46.2445409 47.4045820 42.7611091  
C 46.7372119 45.2202504 42.5290159  
C 45.6748285 46.0542201 42.7811811

C 45.5397873 48.5889079 42.9368066  
H 44.4604710 48.5252163 43.0674446  
C 46.0526889 49.8993192 42.9794735  
N 47.3777622 50.2124376 42.9636970  
C 47.4462229 51.5821847 43.1110782  
C 46.1144130 52.1453493 43.1844295  
C 45.2355769 51.0921065 43.1105460  
C 48.6408855 52.2987909 43.1390173  
H 48.5806822 53.3557460 43.3861808  
C 49.9195694 51.8040843 42.8500452  
C 51.1054229 52.6187588 42.6841485  
C 51.5488490 50.4395713 42.3908538  
N 50.1972056 50.4853483 42.6318830  
C 52.1350353 51.7653070 42.4083153  
C 52.2654643 49.2783270 42.1383422  
H 53.3415843 49.4052178 42.0194497  
C 51.7554229 47.9812288 41.9827276  
C 52.5422428 46.8336073 41.5871984  
N 50.4374305 47.6520356 42.0925485  
C 50.3681026 46.2947024 41.8380442  
C 49.2054959 45.5708947 42.0896514  
H 49.3025439 44.4928430 42.1093616  
C 51.6758804 45.7686106 41.4492178  
Fe 48.8942184 48.9305682 42.5884394  
O 48.5009900 49.3432908 40.7323768  
H 50.1601106 48.1308822 40.0055304  
O 49.9141398 48.6253249 39.2054141  
O 48.4085099 49.2551404 35.7427513  
C 48.9098574 48.1427280 35.4054190  
O 48.4885222 47.4320343 34.4690402  
C 50.1513893 47.6569180 36.1990932

|            |            |            |            |   |            |            |            |
|------------|------------|------------|------------|---|------------|------------|------------|
| C          | 51.2626154 | 48.7306606 | 36.2978040 | C | 46.5758376 | 56.5766916 | 39.5473491 |
| C          | 52.4977774 | 48.3656436 | 37.1681971 | H | 45.9694871 | 56.5850222 | 38.6267258 |
| C          | 53.5568253 | 49.4930351 | 37.2939286 | H | 47.5151038 | 57.1015971 | 39.3090531 |
| H          | 50.1456494 | 50.3494159 | 39.0971346 | C | 46.9540390 | 55.1641772 | 39.8695958 |
| O          | 47.5798055 | 51.1127946 | 37.4639985 | N | 48.2770287 | 54.8336484 | 40.1436160 |
| H          | 47.9545538 | 50.3566295 | 36.9546739 | H | 49.0150418 | 55.5247522 | 40.3611457 |
| H          | 47.0583655 | 50.6846534 | 38.1850334 | C | 48.4204703 | 53.5066403 | 40.2030818 |
| O          | 49.9130907 | 51.3089503 | 39.0193652 | H | 49.3475129 | 52.9379770 | 40.2887583 |
| H          | 48.9700764 | 50.1655807 | 40.5129637 | N | 47.2188167 | 52.9702921 | 39.9967568 |
| H          | 49.1292497 | 51.2862123 | 38.4239584 | H | 47.0160230 | 51.9617278 | 39.9669487 |
| H          | 46.0263134 | 57.1408301 | 40.3085537 | C | 46.2897190 | 53.9655265 | 39.7913275 |
| H          | 45.8379046 | 46.0453552 | 33.0258864 | H | 45.2452156 | 53.7353146 | 39.6190305 |
| H          | 49.5309481 | 49.3676321 | 45.5703593 | C | 45.8178901 | 46.9423682 | 32.4079861 |
| H          | 46.7288976 | 44.1567274 | 42.2904435 | H | 46.4824974 | 46.7543203 | 31.5494267 |
| H          | 44.6265971 | 45.8465199 | 42.9959805 | H | 44.7979179 | 47.0632935 | 32.0229750 |
| H          | 45.8801831 | 53.2068883 | 43.2640447 | N | 46.2740783 | 48.1049379 | 33.1479025 |
| H          | 44.1500633 | 51.1336037 | 43.0210739 | H | 47.1833100 | 47.9439164 | 33.6608055 |
| H          | 51.1610175 | 53.7066602 | 42.7221862 | C | 45.4874624 | 49.0573927 | 33.6653243 |
| H          | 53.1786009 | 52.0050180 | 42.2044120 | N | 44.2207133 | 49.2504488 | 33.2340167 |
| H          | 53.6237094 | 46.8532057 | 41.4526142 | H | 43.9537859 | 48.9555457 | 32.3014777 |
| H          | 51.9956644 | 44.8021026 | 41.0597727 | H | 43.7371187 | 50.0634822 | 33.6056387 |
| H          | 49.8212065 | 47.4097636 | 37.2080338 | N | 45.9557647 | 49.8157769 | 34.6520749 |
| H          | 50.5249389 | 46.7353490 | 35.7527320 | H | 46.9014079 | 49.6435690 | 35.0654184 |
| H          | 51.5930393 | 48.9979633 | 35.2940927 | H | 45.4131709 | 50.6327426 | 34.9250195 |
| H          | 50.8053679 | 49.6350281 | 36.6991908 | S | 49.0262232 | 48.3275791 | 44.8412258 |
| H          | 52.1480683 | 48.0888618 | 38.1627636 | N | 47.5858900 | 47.3579437 | 42.5682435 |
| H          | 52.9718879 | 47.4672671 | 36.7729680 | C | 47.8962691 | 46.0500796 | 42.4030014 |
| H          | 54.4125865 | 49.1484964 | 37.8744741 | C | 46.2229972 | 47.3898493 | 42.8077965 |
| H          | 53.9462093 | 49.7660567 | 36.3131603 | C | 46.7179939 | 45.2083642 | 42.5451815 |
| H          | 53.1770316 | 50.4004896 | 37.7633432 | C | 45.6554520 | 46.0389847 | 42.8113455 |
| <b>TS2</b> |            |            |            | C | 45.5162410 | 48.5692396 | 42.9891420 |

|    |            |            |            |              |            |            |            |
|----|------------|------------|------------|--------------|------------|------------|------------|
| H  | 44.4373712 | 48.5037145 | 43.1214583 | C            | 52.5225594 | 48.3735223 | 37.1331432 |
| C  | 46.0287134 | 49.8819325 | 43.0292005 | C            | 53.5878780 | 49.4963967 | 37.2472323 |
| N  | 47.3501030 | 50.1924280 | 43.0096259 | H            | 50.2206968 | 50.5560280 | 38.9584946 |
| C  | 47.4210239 | 51.5651884 | 43.1379984 | O            | 47.5186383 | 51.1496440 | 37.4186918 |
| C  | 46.0887194 | 52.1297729 | 43.2076552 | H            | 47.9105935 | 50.3839462 | 36.9376373 |
| C  | 45.2100583 | 51.0767874 | 43.1483615 | H            | 47.0128096 | 50.7347985 | 38.1585865 |
| C  | 48.6130219 | 52.2807529 | 43.1529891 | O            | 49.9778874 | 51.4923729 | 38.7771040 |
| H  | 48.5545779 | 53.3399097 | 43.3910729 | H            | 49.1730517 | 49.7686474 | 40.3277578 |
| C  | 49.8921991 | 51.7832163 | 42.8608115 | H            | 49.1406610 | 51.4009519 | 38.2697469 |
| C  | 51.0756216 | 52.5995696 | 42.6897702 | H            | 46.0292778 | 57.1334215 | 40.3085267 |
| C  | 51.5253605 | 50.4205744 | 42.4034411 | H            | 45.8429737 | 46.0462326 | 33.0279691 |
| N  | 50.1716050 | 50.4653740 | 42.6482072 | H            | 49.5331300 | 49.3689096 | 45.5915748 |
| C  | 52.1073328 | 51.7472018 | 42.4148358 | H            | 46.7083110 | 44.1481667 | 42.2922891 |
| C  | 52.2425862 | 49.2636008 | 42.1495688 | H            | 44.6074382 | 45.8276001 | 43.0235974 |
| H  | 53.3180870 | 49.3907631 | 42.0271446 | H            | 45.8554159 | 53.1923301 | 43.2755442 |
| C  | 51.7288097 | 47.9667567 | 41.9920812 | H            | 44.1247382 | 51.1174236 | 43.0561870 |
| C  | 52.5149267 | 46.8201673 | 41.5885032 | H            | 51.1322308 | 53.6874567 | 42.7267037 |
| N  | 50.4122593 | 47.6422268 | 42.1007024 | H            | 53.1492613 | 51.9873686 | 42.2032417 |
| C  | 50.3405604 | 46.2838517 | 41.8395653 | H            | 53.5959531 | 46.8399021 | 41.4504470 |
| C  | 49.1842186 | 45.5598052 | 42.0971246 | H            | 51.9675888 | 44.7920768 | 41.0547854 |
| H  | 49.2799735 | 44.4817046 | 42.1086412 | H            | 49.8312568 | 47.4924489 | 37.2640651 |
| C  | 51.6480276 | 45.7575708 | 41.4469194 | H            | 50.4978971 | 46.7294084 | 35.8307709 |
| Fe | 48.8700797 | 48.9136132 | 42.6050332 | H            | 51.5955827 | 48.9597257 | 35.2527917 |
| O  | 48.4197147 | 49.3599742 | 40.8016425 | H            | 50.8455932 | 49.6602174 | 36.6502037 |
| H  | 50.3460166 | 48.2111188 | 39.9091840 | H            | 52.1773755 | 48.1084697 | 38.1324741 |
| O  | 50.0071516 | 48.8029136 | 39.2182740 | H            | 52.9891385 | 47.4691309 | 36.7426982 |
| O  | 48.4101990 | 49.2719303 | 35.7514657 | H            | 54.4437587 | 49.1515170 | 37.8273990 |
| C  | 48.9039944 | 48.1487953 | 35.4390984 | H            | 53.9751412 | 49.7650379 | 36.2644168 |
| O  | 48.4728102 | 47.4171706 | 34.5229622 | H            | 53.2091512 | 50.4065001 | 37.7123612 |
| C  | 50.1474753 | 47.6779712 | 36.2375883 | <b>Cpd I</b> |            |            |            |
| C  | 51.2795028 | 48.7348484 | 36.2714137 | C            | 46.5816208 | 56.5891454 | 39.5662195 |

|   |            |            |            |    |            |            |            |
|---|------------|------------|------------|----|------------|------------|------------|
| H | 45.9842330 | 56.6046880 | 38.6395921 | C  | 45.9552475 | 49.8467394 | 43.0505345 |
| H | 47.5241272 | 57.1136527 | 39.3406259 | N  | 47.2861986 | 50.1569401 | 43.0043555 |
| C | 46.9549822 | 55.1745482 | 39.8852290 | C  | 47.3626150 | 51.5242934 | 43.1301996 |
| N | 48.2836353 | 54.8369137 | 40.1217901 | C  | 46.0346806 | 52.0939013 | 43.2247461 |
| H | 49.0314542 | 55.5243259 | 40.3150038 | C  | 45.1491506 | 51.0452221 | 43.1879050 |
| C | 48.4196449 | 53.5106587 | 40.1914615 | C  | 48.5587479 | 52.2434225 | 43.1338179 |
| H | 49.3489504 | 52.9454079 | 40.2465340 | H  | 48.5007681 | 53.3034376 | 43.3681787 |
| N | 47.2090094 | 52.9802515 | 40.0279036 | C  | 49.8304151 | 51.7473383 | 42.8533375 |
| H | 47.0034258 | 51.9721724 | 40.0076966 | C  | 51.0201720 | 52.5588141 | 42.6928440 |
| C | 46.2801619 | 53.9805920 | 39.8395233 | C  | 51.4680239 | 50.3769715 | 42.4276717 |
| H | 45.2286022 | 53.7574513 | 39.7032468 | N  | 50.1160556 | 50.4214391 | 42.6518049 |
| C | 45.8467761 | 46.9373381 | 32.4412460 | C  | 52.0519863 | 51.7023076 | 42.4351585 |
| H | 46.5172141 | 46.7620197 | 31.5842168 | C  | 52.1928001 | 49.2131167 | 42.1960514 |
| H | 44.8308803 | 47.0758301 | 32.0507937 | H  | 53.2710119 | 49.3376629 | 42.0947154 |
| N | 46.3050477 | 48.0752580 | 33.2184263 | C  | 51.6753589 | 47.9270793 | 42.0352734 |
| H | 47.1676145 | 47.8752062 | 33.7908658 | C  | 52.4508079 | 46.7755234 | 41.6260409 |
| C | 45.5232081 | 49.0480542 | 33.7080682 | N  | 50.3510998 | 47.6062350 | 42.1417428 |
| N | 44.2755579 | 49.2687113 | 33.2387635 | C  | 50.2691898 | 46.2614975 | 41.8675635 |
| H | 44.0246395 | 48.9678159 | 32.3038178 | C  | 49.1064158 | 45.5344798 | 42.1222288 |
| H | 43.8079221 | 50.1025321 | 33.5849292 | H  | 49.2044095 | 44.4564737 | 42.1293501 |
| N | 45.9811153 | 49.7984045 | 34.7051635 | C  | 51.5733341 | 45.7252650 | 41.4721367 |
| H | 46.9152525 | 49.6147566 | 35.1365345 | Fe | 48.7834923 | 48.8960301 | 42.4935698 |
| H | 45.4417865 | 50.6161183 | 34.9819379 | O  | 48.4501102 | 49.1614240 | 40.8815356 |
| S | 48.9013770 | 48.3210503 | 44.8860198 | H  | 51.1935896 | 49.0972920 | 39.9225195 |
| N | 47.5094008 | 47.3310798 | 42.6015195 | O  | 50.4648166 | 49.1503214 | 39.2876404 |
| C | 47.8275878 | 46.0188151 | 42.4301666 | O  | 48.4308548 | 49.2701736 | 35.8519621 |
| C | 46.1533832 | 47.3606740 | 42.8403526 | C  | 48.8880921 | 48.1178459 | 35.5960274 |
| C | 46.6483222 | 45.1805360 | 42.5767938 | O  | 48.3912122 | 47.3220082 | 34.7717786 |
| C | 45.5867326 | 46.0120484 | 42.8443911 | C  | 50.1807680 | 47.6934777 | 36.3461977 |
| C | 45.4426306 | 48.5447333 | 43.0221399 | C  | 51.3011678 | 48.7610113 | 36.2785895 |
| H | 44.3646760 | 48.4787199 | 43.1606516 | C  | 52.6174404 | 48.4025570 | 37.0262276 |

|   |            |            |            |
|---|------------|------------|------------|
| C | 53.6560849 | 49.5518032 | 37.1198487 |
| H | 50.1867737 | 50.8244143 | 38.8024106 |
| O | 47.3698662 | 51.2137574 | 37.3602172 |
| H | 47.8248991 | 50.4588427 | 36.9225798 |
| H | 46.9478442 | 50.7991277 | 38.1510680 |
| O | 49.9613114 | 51.7285774 | 38.4822624 |
| H | 49.6551321 | 49.0754978 | 39.8803832 |
| H | 49.0836108 | 51.6079140 | 38.0637628 |
| H | 46.0298624 | 57.1434168 | 40.3254382 |
| H | 45.8556682 | 46.0288359 | 33.0434185 |
| H | 49.4588728 | 49.3446794 | 45.6247546 |
| H | 46.6361973 | 44.1208549 | 42.3218504 |
| H | 44.5384495 | 45.8013033 | 43.0559473 |
| H | 45.8075603 | 53.1579837 | 43.2896456 |
| H | 44.0618872 | 51.0898996 | 43.1252219 |
| H | 51.0815966 | 53.6466046 | 42.7245610 |
| H | 53.0950265 | 51.9384441 | 42.2245075 |
| H | 53.5317042 | 46.7845080 | 41.4858635 |
| H | 51.8848342 | 44.7606058 | 41.0715527 |
| H | 49.9292025 | 47.5293715 | 37.3939815 |
| H | 50.5186180 | 46.7333968 | 35.9561091 |
| H | 51.5263535 | 48.9838573 | 35.2356618 |
| H | 50.8943086 | 49.6840240 | 36.6916032 |
| H | 52.3622689 | 48.0659261 | 38.0310332 |
| H | 53.0814300 | 47.5370895 | 36.5532088 |
| H | 54.5502868 | 49.2132671 | 37.6431682 |
| H | 53.9836720 | 49.8568432 | 36.1260155 |
| H | 53.2862631 | 50.4449840 | 37.6233634 |
